# 1 **Globally invariant metabolism but density-diversity mismatch in springtails**

2 Anton M. Potapov<sup>1,2\*</sup>, Carlos A. Guerra<sup>3,4</sup>, Johan van den Hoogen<sup>5</sup>, Anatoly Babenko<sup>2</sup>, Bruno C. Bellini<sup>6</sup>,  
3 Matty P. Berg<sup>7,8</sup>, Steven L. Chown<sup>9</sup>, Louis Deharveng<sup>10</sup>, Lubomír Kováč<sup>11</sup>, Natalia A. Kuznetsova<sup>12</sup>, Jean-  
4 François Ponge<sup>13</sup>, Mikhail B. Potapov<sup>12</sup>, David J. Russell<sup>14</sup>, Douglas Alexandre<sup>15</sup>, Juha M. Alatalo<sup>16</sup>, Javier  
5 I. Arbea<sup>17</sup>, Ipsa Bandyopadhyay<sup>18</sup>, Verónica Bernava<sup>19</sup>, Stef Bokhorst<sup>7</sup>, Thomas Bolger<sup>20,21</sup>, Gabriela  
6 Castaño-Meneses<sup>22</sup>, Matthieu Chauvat<sup>23</sup>, Ting-Wen Chen<sup>24,1</sup>, Mathilde Chomel<sup>25</sup>, Aimee T. Classen<sup>26</sup>,  
7 Jerome Cortet<sup>27</sup>, Peter Čuchta<sup>24</sup>, Ana Manuela de la Pedrosa<sup>25</sup> Susana S. D. Ferreira<sup>7</sup>, Cristina Fiera<sup>27</sup>,  
8 Juliane Filser<sup>28</sup>, Oscar Franken<sup>7,8,85</sup>, Saori Fujii<sup>29</sup>, Essivi Gagnon Koudji<sup>30</sup>, Meixiang Gao<sup>31</sup>, Benoit  
9 Gendreau-Berthiaume<sup>32</sup>, Diego F. Gomez-Pamies<sup>33</sup>, Michelle Greve<sup>34</sup>, I. Tanya Handa<sup>30</sup>, Charlène  
10 Heiniger<sup>35</sup>, Martin Holmstrup<sup>36</sup>, Pablo Homel<sup>37</sup>, Mari Ivask<sup>38</sup>, Charlene Janion-Scheepers<sup>39,4</sup>, Malte  
11 Jochum<sup>3,4</sup>, Sophie Joimel<sup>40</sup>, Bruna Claudia S. Jorge<sup>41</sup>, Edite Jucevica<sup>42</sup>, Luís Carlos Iuñes de Oliveira  
12 Filho<sup>43</sup>, Osmar Klauber-Filho<sup>43</sup>, Dilmar Baretta<sup>44</sup>, Eveline J. Krab<sup>45,46</sup>, Annely Kuu<sup>47</sup>, Estevam C. A. de  
13 Lima<sup>48</sup>, Dunmei Lin<sup>49</sup>, Amy Liu<sup>9</sup>, Jing-Zhong Lu<sup>1</sup>, María José Luciañez<sup>25</sup>, Michael T. Marx<sup>50</sup>, Matthew M.  
14 McCary<sup>51</sup>, Maria A. Minor<sup>52</sup>, Taizo Nakamori<sup>53</sup>, Ilaria Negri<sup>54</sup>, Raúl Ochoa-Hueso<sup>55,56</sup>, José G. Palacios-  
15 Vargas<sup>57</sup>, Melanie M. Pollierer<sup>1</sup>, Pascal Querner<sup>58,59</sup>, Natália Raschmanová<sup>11</sup>, Muhammad Imtiaz Rashid<sup>60</sup>,  
16 Laura J. Raymond-Léonard<sup>30</sup>, Laurent Rousseau<sup>30</sup>, Ruslan A. Saifutdinov<sup>2</sup>, Sandrine Salmon<sup>61</sup>, Emma J.  
17 Sayer<sup>62,63</sup>, Nicole Scheunemann<sup>1,64</sup>, Cornelia Scholz<sup>59</sup>, Julia Seeber<sup>65,66</sup>, Yulia B. Shveenkova<sup>67</sup>, Sophya K.  
18 Stebaeva<sup>2</sup>, Maria Sterzynska<sup>68</sup>, Xin Sun<sup>69</sup>, Winda I Susanti<sup>1</sup>, Anastasia A. Taskaeva<sup>70</sup>, Madhav P.  
19 Thakur<sup>71</sup>, Maria A. Tsiafouli<sup>72</sup>, Matthew S. Turnbull<sup>73</sup>, Mthokozisi N. Twala<sup>34</sup>, Alexei V. Uvarov<sup>2</sup>, Lisa A.  
20 Venier<sup>74</sup>, Lina A. Widenfalk<sup>75,76</sup>, Bruna R. Winck<sup>41</sup>, Daniel Winkler<sup>77</sup>, Donghui Wu<sup>78,79,80</sup>, Zhijing Xie<sup>78</sup>,  
21 Rui Yin<sup>81,82</sup>, Douglas Zeppelini<sup>83</sup>, Thomas W. Crowther<sup>5</sup>, Nico Eisenhauer<sup>3,81</sup>, Stefan Scheu<sup>1,84</sup>

22

23 <sup>1</sup>Johann Friedrich Blumenbach Institute of Zoology and Anthropology, University of Göttingen, Göttingen,  
24 Germany. <sup>2</sup>A.N. Severtsov Institute of Ecology and Evolution, Russian Academy of Sciences, Moscow, Russia.  
25 <sup>3</sup>Experimental Interaction Ecology Group, German Centre for Integrative Biodiversity Research (iDiv) Halle-  
26 Jena-Leipzig, Leipzig, Germany. <sup>4</sup>Institute of Biology, Martin Luther University Halle Wittenberg, Halle  
27 (Saale), Germany. <sup>5</sup>Department of Environmental Systems Science, Institute of Integrative Biology, ETH  
28 Zürich, Zürich, Switzerland. <sup>6</sup>Department of Botany and Zoology, Federal University of Rio Grande do Norte,  
29 RN, Brazil. <sup>7</sup>Department of Ecological Science, Vrije Universiteit Amsterdam, Amsterdam, the Netherlands.

30 <sup>8</sup>Community and Conservation Ecology Group, Groningen Institute of Evolutionary Life Science, University of  
31 Groningen, Amsterdam, the Netherlands. <sup>9</sup>Securing Antarctica's Environmental Future, School of Biological  
32 Sciences, Monash University, Australia. <sup>10</sup>ISYEB, Muséum National d'Histoire Naturelle, Paris, France.  
33 <sup>11</sup>Department of Zoology, Institute of Biology and Ecology, Faculty of Science, Pavol Jozef Šafárik University  
34 in Košice, Košice, Slovakia. <sup>12</sup>Institute of Biology and Chemistry, Moscow Pedagogical State University,  
35 Moscow, Russia. <sup>13</sup>Département Adaptations du Vivant, Muséum National d'Histoire Naturelle, Brunoy,  
36 France. <sup>14</sup>Department of Soil Zoology, Senckenberg Society for Nature Research, Görlitz, Germany.  
37 <sup>15</sup>Department of Soil Science, Centre for Agriculture and Veterinary Science, Santa Catarina State University  
38 University (UDUESC- Lages), Lages, SC, Brazil. <sup>16</sup>Environmental Science Center, Qatar University, Doha,  
39 Qatar. <sup>17</sup>Department of Sciences, CEPA Camargo, Astillero, Spain. <sup>18</sup>Visva Bharati University, Bengal, India.  
40 <sup>19</sup>Administración de Parques Nacionales, Argentina. <sup>20</sup>School of Biology and Environmental Science, University  
41 College Dublin, Dublin, Ireland. <sup>21</sup>Earth Institute, University College Dublin, Dublin, Ireland. <sup>22</sup>Unidad  
42 Multidisciplinaria de Docencia e Investigación, Facultad de Ciencias, Campus Juriquilla, Universidad Nacional  
43 Autónoma de México, Querétaro, México. <sup>23</sup>Normandie University - UNIROUEN, INRAE, ECODIV, Rouen,  
44 France. <sup>24</sup>Biology Centre of the Czech Academy of Sciences, Institute of Soil Biology, České Budějovice,  
45 Czech Republic. <sup>25</sup>Departamento de Biología (Zoología, Universidad Autónoma de Madrid, Spain. <sup>26</sup>Department  
46 of Ecology & Evolutionary Biology, University of Michigan, MI 48109. <sup>27</sup>Institute of Biology Bucharest,  
47 Romanian Academy, Romania. <sup>28</sup>FB 02, UFT, General and Theoretical Ecology, University of Bremen,  
48 Bremen, Germany. <sup>29</sup>Department of Forest Entomology, Forestry and Forest Products Research Institute,  
49 Tsukuba, Japan. <sup>30</sup>Département des Sciences Biologiques, Université du Québec à Montréal, Québec, Canada.  
50 <sup>31</sup>Department of Geography and Spatial Information Techniques, Ningbo University, Ningbo, China.  
51 <sup>32</sup>Département des Sciences Naturelles, Université du Québec en Outaouais, Québec, Canada. <sup>33</sup>Instituto de  
52 Biología Subtropical, Consejo Nacional de Investigaciones Científicas y Técnicas-Universidad Nacional de  
53 Misiones, Puerto Iguazú, Argentina. <sup>34</sup>Department of Plant and Soil Sciences, University of Pretoria, Pretoria,  
54 South Africa. <sup>35</sup>HES-SO University of Applied Sciences and Arts Western Switzerland. <sup>36</sup>Section of Terrestrial  
55 Ecology, Department of Ecoscience, Aarhus University, Aarhus, Denmark. <sup>37</sup>Instituto de Recursos Naturales y  
56 Agrobiología de Sevilla (IRNAS), Consejo Superior de Investigaciones Científicas (CSIC), Sevilla, Spain.  
57 <sup>38</sup>Tartu College, Tallinn University of Technology, <sup>39</sup>Department of Biological Sciences, University of Cape  
58 Town, Rondebosch, South Africa. <sup>40</sup>Université Paris-Saclay, INRAE, AgroParisTech, UMR EcoSys, 78850  
59 Thiverval-Grignon. <sup>41</sup>Quantitative Ecology Lab, Department of Ecology, Universidade Federal do Rio Grande

60 do Sul, Porto Alegre, Brazil. <sup>42</sup>Institute of Biology, University of Latvia, Riga, Latvia. <sup>43</sup>Department of Soil  
61 Science, Centre for Agriculture and Veterinary Science, Santa Catarina State University (UDESC-Lages),  
62 Lages, SC, Brazil. <sup>44</sup>Department of Animal Science, Santa Catarina State University (UDESC Oeste), Chapecó,  
63 SC, Brazil. <sup>45</sup>Department of Soil and Environment, Swedish University of Agricultural Sciences, Uppsala,  
64 Sweden. <sup>46</sup>Climate Impacts Research Centre, Department of Ecology and Environmental Science, Umeå  
65 University, Abisko, Sweden. <sup>47</sup>Institute of Agricultural and Environmental Sciences, Estonian University of Life  
66 Sciences, Tartu, Estonia. <sup>48</sup>Departamento de Entomologia, Museu Nacional, Universidade Federal do Rio de  
67 Janeiro, Rio de Janeiro, Brazil. <sup>49</sup>Key Laboratory of the Three Gorges Reservoir Region's Eco-Environment,  
68 Ministry of Education, Chongqing University, Chongqing, China. <sup>50</sup>Institute of Zoology, Johannes Gutenberg  
69 University Mainz, Mainz, Germany. <sup>51</sup>Department of BioSciences, Rice University, Houston, US. <sup>52</sup>Wildlife &  
70 Ecology Group, School of Agriculture and Environment, Massey University, New Zealand. <sup>53</sup>Graduate School  
71 of Environment and Information Sciences, Yokohama National University, Yokohama, Japan. <sup>54</sup>Department of  
72 Sustainable Crop Production (DI.PRO.VE.S.), Università Cattolica del Sacro Cuore, Piacenza, Italy.  
73 <sup>55</sup>Department of Biology, IVAGRO, University of Cádiz, Puerto Real, Spain. <sup>56</sup>Department of Terrestrial  
74 Ecology, Netherlands Institute of Ecology (NIOO KNAW), Wageningen, NL-6700 AB the Netherlands. <sup>57</sup>Lab.  
75 Ecología y Sistemática de Microartrópodos, Depto. Ecología y Recursos Naturales, Facultad de Ciencias,  
76 Universidad Nacional Autónoma de México, México, México. <sup>58</sup>Natural History Museum Vienna, 1. Zoology,  
77 Vienna, Austria. <sup>59</sup>Department of Integrated Biology and Biodiversity Research, University of Natural  
78 Resources and Life Sciences, Vienna, Austria. <sup>60</sup>Center of Excellence in Environmental Studies, King Abdulaziz  
79 University, Saudi Arabia. <sup>61</sup>UMR 7179 MECADEV - AVIV department, Muséum National d'Histoire Naturelle,  
80 Brunoy, France. <sup>62</sup>Lancaster Environment Centre, Lancaster University, Lancaster, UK. <sup>63</sup>Smithsonian Tropical  
81 Research Institute, Balboa, Ancon, Panama, Rep. Panama. <sup>64</sup>Department of Soil Zoology, Senckenberg Museum  
82 of Natural History Görlitz, Görlitz, Germany. <sup>65</sup>Institute for Alpine Environment, Eurac Research, Bozen, Italy.  
83 <sup>66</sup>Department of Ecology, University of Innsbruck, Innsbruck, Austria. <sup>67</sup>State Nature Reserve "Privolzhskaya  
84 Lesostep", Penza, Russia. <sup>68</sup>Department of Systematics, Zoogeography and Ecology of Invertebrates, Museum  
85 and Institute of Zoology Polish Academy of Science, Warsaw, Poland. <sup>69</sup>Key Laboratory of Urban Environment  
86 and Health, Institute of Urban Environment, Chinese Academy of Sciences, Xiamen, China. <sup>70</sup>Institute of  
87 Biology, Komi Science Centre, Ural Branch of Russian Academy of Sciences, Syktyvkar, Russia. <sup>71</sup>Institute of  
88 Ecology & Evolution, University of Bern, Bern, Switzerland. <sup>72</sup>Department of Ecology, School of Biology,  
89 Aristotle University of Thessaloniki, Thessaloniki, Greece. <sup>73</sup>Unaffiliated, Edmonton, Canada. <sup>74</sup>Canadian

90 Forest Service, Natural Resources Canada, Sault Ste. Marie, Canada. <sup>75</sup>Department of Ecology, Swedish  
91 University of Agricultural Sciences, Uppsala, Sweden. <sup>76</sup>Greensway AB, Uppsala, Sweden. <sup>77</sup>Institute of  
92 Wildlife Management and Wildlife Biology, University of Sopron, Sopron, Hungary. <sup>78</sup>Key laboratory of  
93 Wetland Ecology and Environment, Northeast Institute of Geography and Agroecology, Chinese Academy of  
94 Sciences, Changchun 130102, China. <sup>79</sup>Key Laboratory of Vegetation Ecology, Ministry of Education,  
95 Northeast Normal University, Changchun 130024, China. <sup>80</sup>Jilin Provincial Key Laboratory of Animal Resource  
96 Conservation and Utilization, Northeast Normal University, Changchun 130117, China. <sup>81</sup>Institute of Biology,  
97 Leipzig University, Leipzig, Germany. <sup>82</sup>Community Department, Helmholtz Center for Environmental  
98 Research, Halle, Germany. <sup>83</sup>Department of Biology, Paraiba State University, Brazil. <sup>84</sup>Centre of Biodiversity  
99 and Sustainable Land Use, University of Göttingen, Göttingen, Germany. <sup>85</sup>Department of Coastal Systems,  
100 Royal Netherlands Institute for Sea Research, Landsdiep 4, 't Horntje (Texel), 1797 SZ the Netherlands. \*e-  
101 mail: [potapov.msu@gmail.com](mailto:potapov.msu@gmail.com)

102

103 **Soil life supports the functioning and biodiversity of terrestrial ecosystems<sup>1,2</sup>.**  
104 **Springtails (Collembola) are among the most abundant soil animals regulating soil**  
105 **fertility and flow of energy through above- and belowground food webs<sup>3-5</sup>. However, the**  
106 **global distribution of springtail diversity and density, and how these relate to energy**  
107 **fluxes remains unknown. Here, using a global dataset collected from 2,470 sites, we**  
108 **estimate total soil springtail biomass at 29 Mt carbon (threefold higher than wild**  
109 **terrestrial vertebrates<sup>6</sup>) and record peak densities up to 2 million individuals per m<sup>2</sup> in**  
110 **the Arctic. Despite a 20-fold biomass difference between tundra and the tropics,**  
111 **springtail energy use (community metabolism) remains similar across the latitudinal**  
112 **gradient, owing to the increase in temperature. Neither springtail density nor**  
113 **community metabolism were predicted by local species richness, which was highest in**  
114 **the tropics, but comparably high in some temperate forests and even tundra. Changes**  
115 **in springtail activity may emerge from latitudinal gradients in temperature,**  
116 **predation<sup>7,8</sup>, and resource limitation<sup>7,9,10</sup> in soil communities. Contrasting temperature**

117 **responses of biomass, diversity and activity of springtail communities suggest that**  
118 **climate warming will alter fundamental soil biodiversity metrics in different directions,**  
119 **potentially restructuring terrestrial food webs and affecting major soil functions.**

120

121 Soil biodiversity is an essential component of every terrestrial habitat that affects nutrient  
122 cycling, soil fertility and plant-soil feedbacks, among other ecosystem functions and  
123 services<sup>1,2,11</sup>. Soil functioning is jointly driven by multiple components of soil biota that are  
124 closely interconnected, including plants, microorganisms, micro-, meso-, and macrofauna<sup>12,13</sup>.  
125 Land use, human activities, and climate changes induce widespread and rapid changes in the  
126 abundance, diversity, and activity of soil biota, altering functional connections and  
127 ecosystem-level processes in the terrestrial biosphere<sup>14</sup>. To understand, predict, and adapt to  
128 these changes, comprehensive knowledge about the global distribution of multiple soil biota  
129 components is urgently needed<sup>15,16</sup>.

130 With a growing understanding of the biogeography of microorganisms<sup>17</sup>, micro-<sup>18</sup> and  
131 macrofauna<sup>19</sup>, a critical knowledge gap is the global distribution of soil mesofauna.

132 Springtails (Collembola, Hexapoda) are among the most abundant groups of mesofauna and  
133 soil animals from the equator to polar regions<sup>4,5</sup>. They are mostly microbial feeders, but also  
134 graze on litter and are often closely associated with plant roots<sup>3,20</sup>. Through these trophic  
135 relationships, springtails affect the growth and dispersal of prokaryotes, fungi, and plants,  
136 thereby supporting nutrient cycling via the transformation, degradation, and stabilisation of  
137 organic matter<sup>5,21</sup>. Furthermore, springtails are a key food resource for soil- and surface-  
138 dwelling predators<sup>3,5</sup>, thus occupying a central position in soil food webs and supporting  
139 multitrophic biodiversity.

140 To assess different functional facets of biological communities, metrics such as population  
141 density and biomass (reflecting carbon stocks), taxonomic and phylogenetic diversity

142 (ensuring multifunctionality and stability), and metabolic activity (quantifying energy fluxes  
143 and thus functional influence) are commonly used<sup>6,22–24</sup>. Soil biodiversity assessments have  
144 found unexpected global hotspots in temperate regions for microorganisms (fungi and  
145 prokaryotes)<sup>17</sup> and macrofauna (earthworms)<sup>19</sup>, which are not in line with the common  
146 latitudinal biodiversity gradient found in aboveground organisms<sup>25</sup>. Functional  
147 complementarity principles<sup>23</sup> suggest that diverse soil communities in temperate ecosystems  
148 are able to support higher organismal densities and have a more efficient resource use (i.e.,  
149 higher total activity) than at other latitudes. However, there are no global assessments of soil  
150 animal metabolic activities. In contrast to expectations of complementarity principles,  
151 previous studies on plants<sup>26,27</sup> and microbes<sup>9,17</sup> suggest that diversity and activity (represented  
152 by respiration) do not co-vary at the global scale, probably because strong environmental  
153 constraints limit this relationship. These discrepancies emphasize the need to investigate  
154 relationships of multiple metrics of soil animal communities. Springtails are an ideal model  
155 organism for exploring such relationships at a global scale, due to their ubiquity, functional  
156 diversity and high local species richness<sup>3–5</sup>.

157 Current knowledge suggests that springtails are especially abundant and diverse in temperate  
158 coniferous forests and tundra, but less diverse in polar regions<sup>24,28</sup>. Many springtails are  
159 adapted to high and stable humidity, and sensitive to drought and temperature changes<sup>29,30</sup>.

160 Consequently, springtail density and diversity is likely to decrease with future climate  
161 change, detrimentally affecting soil food webs and ecosystem functioning<sup>31</sup>. At the same  
162 time, springtail densities are relatively high in urban areas and in agricultural fields<sup>32,33</sup>, so  
163 global springtail biomass may be moderately affected by land-use changes worldwide.

164 Disentangling the roles of vegetation, climate, human disturbance, and other drivers of  
165 various springtail community metrics will be critical to understand their contribution to soil  
166 functioning under different global change scenarios<sup>15,18</sup>.

167 Here, we report the joint projection of density, diversity, and metabolic activity of soil  
168 springtail communities at the global scale and test whether high species richness supports  
169 increased density and total activity across springtail communities globally, or whether this  
170 relationship is constrained by environmental and biotic controls. We further aimed (1) to  
171 assess whether the global distribution of springtail diversity matches that of aboveground  
172 biota or other soil animals; (2) to test how different metrics of springtail communities are  
173 affected by climate and human activities; and (3) to quantify the global biomass of springtails  
174 as a component of the global carbon stock. Using an extensive dataset of soil springtail  
175 communities collected within the framework of the #GlobalCollembola initiative<sup>5</sup> (2,470  
176 sites and 43,601 samples across all continents; Fig. 1a), we show contrasting patterns across  
177 soil biodiversity metrics at a global scale and demonstrate that springtails are among the most  
178 functionally important and ubiquitous animals in the terrestrial biosphere.

## 179 Latitudinal gradient

180 To calculate total biomass and metabolism of each springtail community, we used recorded  
181 population densities together with estimated individual body masses and metabolic rates.  
182 Body masses and metabolic rates were derived from taxon-specific body lengths using mean  
183 annual soil temperature and allometric regressions (for calculations and parameter  
184 uncertainties see Methods). For the assessment of local species richness, we selected 70% of  
185 the sampling sites with taxonomically-resolved communities and calculated rarefaction  
186 curves to account for unequal sampling efforts. As such, our trends refer to local diversity  
187 (hundreds of meters), but may not be representative of regional-level diversity<sup>34</sup>.  
188 Springtail density varied c. 30-fold across latitudes (Fig. 1b), with maximum densities in  
189 tundra (median = 131,422 individuals m<sup>-2</sup>) and minimum densities in tropical forests (5,831  
190 individuals m<sup>-2</sup>) and agricultural ecosystems (3,438 individuals m<sup>-2</sup>; Fig. S2; n = 2,210).



191 Springtail dry biomass followed the same trend, with c. 20-fold higher biomass in tundra  
 192 (median = 3.09 g m<sup>-2</sup>) compared to tropical agricultural and forest ecosystems (c. 0.16 g m<sup>-2</sup>),  
 193 due to a lower average community body mass in polar as opposed to temperate and tropical  
 194 ecosystems (Fig. 1d,f; Fig. S2; n = 2,053). These density and biomass estimates are in line  
 195 with earlier studies<sup>24</sup> but cover wider environmental gradients. The difference in average  
 196 community body mass may be explained by lower proportion of large surface-dwelling  
 197 springtail genera in polar regions<sup>35</sup>.

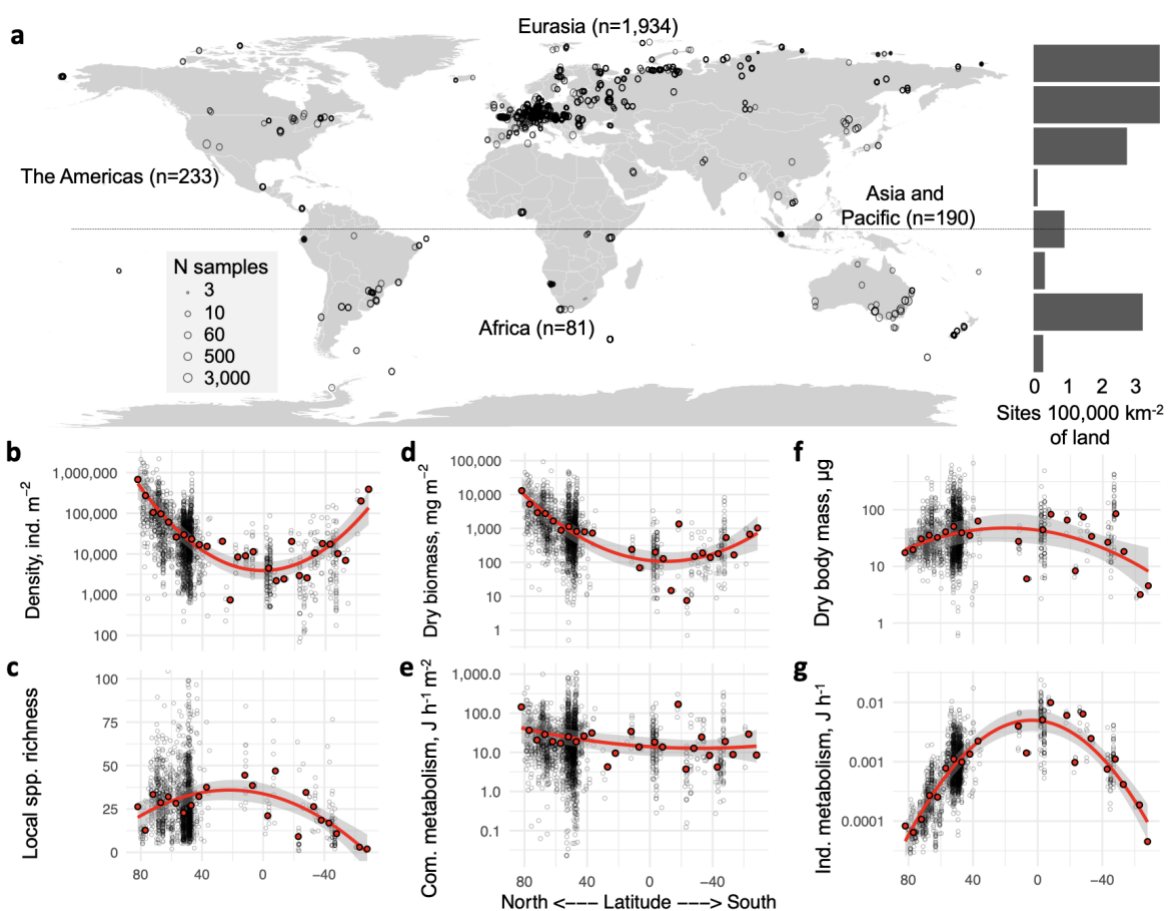

198

199 **Fig. 1 | Sampling locations and latitudinal gradients in springtail community metrics. a,**

200 Distribution of the 2,470 sampling sites (43,601 soil samples). The histogram shows the  
 201 number of sites in each 20-degree latitudinal belt, relative to the total land area in the belt. **b-**  
 202 **g,** Variation in density (n = 2,210), local species richness (n = 1,735), biomass, community  
 203 metabolism, average body mass and average individual metabolism (n = 2,053) with latitude.



204 Grey circles across panels show sampling sites; red points are averages for 5-degree  
205 latitudinal belts; trends are illustrated with a quadratic function based on 5-degree averages.  
206  
207 Being dependent on temperature and body mass, average individual metabolism was  
208 approximately 20 times higher in tropical than in polar ecosystems (Fig. 1g), which resulted  
209 in similar community metabolism across the latitudinal gradient (Fig. 1e; total n = 2,053).  
210 Hence, tropical springtail communities expend a similar amount of energy per unit time and  
211 area as polar communities, despite having 20-fold lower biomass. This striking pattern  
212 resembles aboveground ecosystem respiration, which also changes little across the global  
213 temperature gradient<sup>27</sup>. High metabolic rates but low densities of springtail communities are  
214 consistent with the high soil respiration rates and low litter accumulation in the tropics  
215 compared to biomes at higher latitudes<sup>9,16</sup>. Litter removal is facilitated by soil animals, which  
216 have to consume more food per unit biomass to meet their metabolic needs under high  
217 tropical temperatures<sup>7</sup> and thus enhance decomposition in wet and warm tropical  
218 ecosystems<sup>10</sup>. This suggests that soil animal communities in the tropics are under strong  
219 bottom-up control (by the amount and quality of litter), but also under strong top-down  
220 control by predators, which likewise have to feed more at high temperatures<sup>7,8</sup>. By contrast,  
221 polar communities have access to ample organic matter stocks<sup>16</sup>, are under weaker top-down  
222 control<sup>7,8</sup>, but their activity is constrained by the cold environment. The latitudinal gradient in  
223 environmental and biotic controls may explain why community metabolism did not increase  
224 as expected towards warm tropical ecosystems.

225 We found only weak latitudinal trends in local species richness, which was highest in tropical  
226 forests (mean = 36.6 species site<sup>-1</sup>) and lowest in temperate agricultural (19.5 species site<sup>-1</sup>)  
227 and grassland ecosystems (22.8 species site<sup>-1</sup>; Fig. 1c; Fig. S2). Generally, the similar local  
228 diversity in different climates deviates from the latitudinal biodiversity gradients reported for

229 aboveground and aquatic taxa<sup>25,26</sup> and corroborates the hypothesized mismatch between  
230 above- and belowground biodiversity distributions<sup>36</sup>. This mismatch calls for explicit  
231 assessments of soil biodiversity hotspots for monitoring and conservation of soil organisms<sup>15</sup>.

## 232 Global distribution and its drivers

233 To map the global distribution of springtail community metrics and uncover its drivers, we  
234 pre-selected climatic, vegetation, soil, topographic and anthropogenic variables with known  
235 ecological effects on springtails (Extended Data Fig. 9a). To perform a global extrapolation,  
236 we used 22 of the pre-selected variables that were globally available and applied a random  
237 forest algorithm to identify the strongest spatial associations of community parameters with  
238 environmental layers<sup>18</sup>. To reveal the key driving factors of springtail communities, we ran a  
239 path analysis with 12 non-collinear variables (Extended Data Fig. 9b). The European spatial  
240 clustering in our data distribution (Fig. 1a), was taken in consideration with a continental-  
241 scale validation in both analyses (see Methods).

242 At the global scale, species richness was not related to biomass (Pearson's  $R^2 = 0.02$ ) or  
243 density (Pearson's  $R^2 = 0.03$ ; Fig. 2a). Our extrapolations revealed at least five types of  
244 geographical areas with specific combinations of density and species richness patterns (Fig.  
245 2a): (1) polar regions with very high densities and medium to high species richness such as  
246 the Arctic; (2) temperate regions with medium densities and high species richness such as  
247 mountainous and forested areas in Europe, Asia and North America; (3) temperate regions  
248 with medium to high densities but moderate species richness such as arid temperate biomes  
249 (e.g., dry grasslands); (4) temperate, subtropical and tropical arid ecosystems with low  
250 densities and species richness such as semi-deserts and other arid regions; (5) tropical areas  
251 with low densities but high species richness such as tropical forests and grasslands. Hotspots  
252 of springtail community metabolism were observed across a range of different latitudes (Fig.

253 2b), but were not associated with biodiversity hotspots (Pearson's  $R^2 < 0.01$ ), emphasizing  
254 that species richness is neither associated with higher density nor activity of springtail  
255 communities at the global scale.

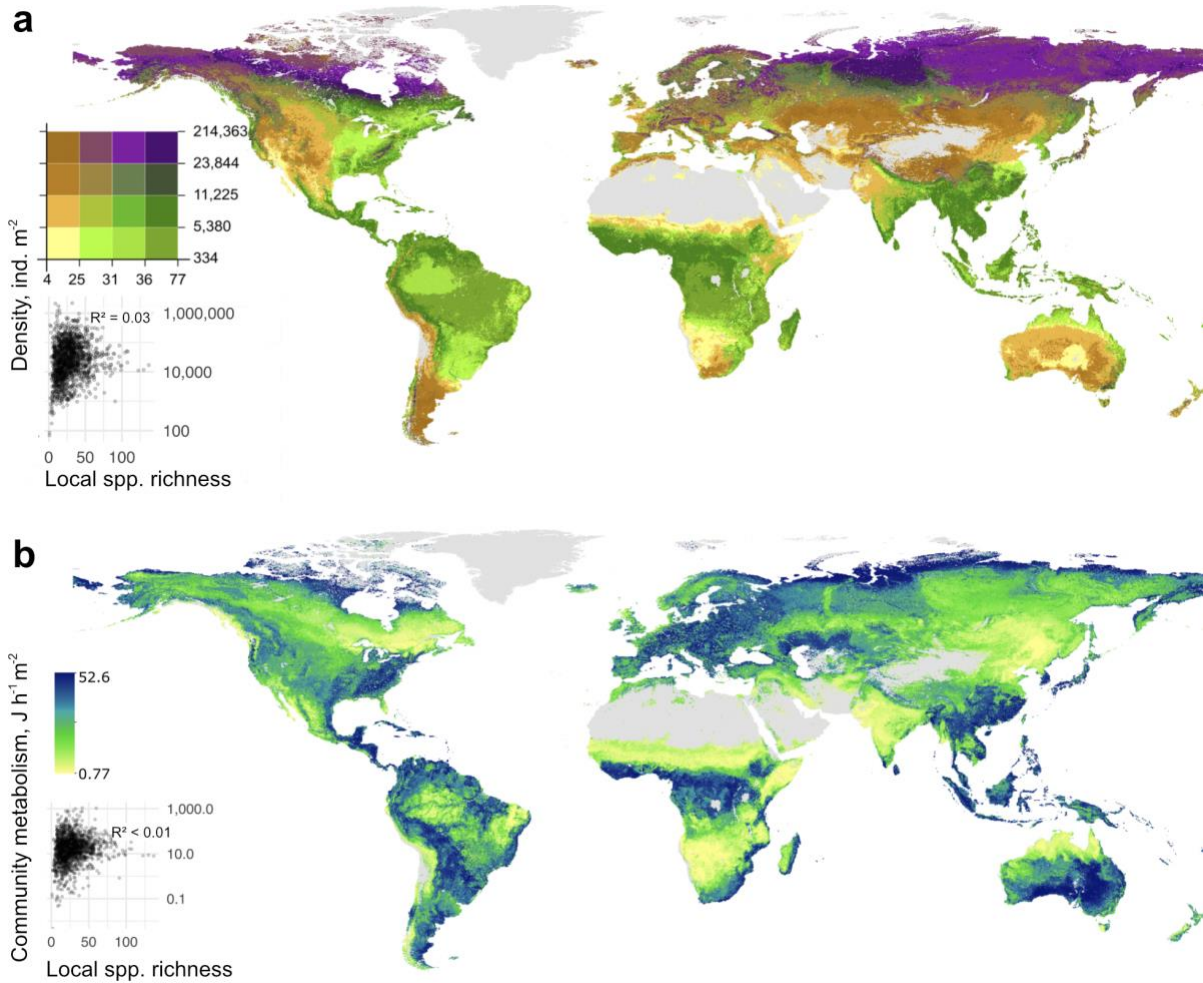

256

257 **Fig. 2 | Global maps overlapping modelled springtail density and local species richness**  
258 **(a) and community metabolism (b) in soil.** In (a) colours distinguish areas with different  
259 combinations of density and species richness, e.g., low density - low richness is given in  
260 yellow and high density - high richness in violet. In (b) the colour gradient indicates  
261 community metabolism, with potential hotspots shown in blue. All data were projected at the  
262 30 arcsec (approximately 1 km<sup>2</sup>) pixel scale. Pixels below the extrapolation threshold are  
263 masked. Correlations between density or metabolism and species richness (inset graphs) are  
264 based on site-level data.

265

266 Path analysis suggested that springtail density increases with latitude, NDVI (vegetation  
 267 richness), aridity index and at high soil pH, but decreases with increasing mean annual  
 268 temperature and elevation (Fig. 3). The positive global relationship of density with the aridity  
 269 index was unexpected for physiologically moisture-dependent animals such as springtails<sup>29</sup>,  
 270 but was also observed in nematodes<sup>18</sup> and is probably due to the low amount of precipitation  
 271 in circumpolar climates and very few data from desert sites. Density and biomass of  
 272 springtails increased with precipitation within the tropical zone (Extended Data Fig. 8).  
 273 Similar to patterns for earthworms<sup>19</sup>, soil properties had less evident linear effects on  
 274 springtail density than climate at the global scale. However, the relationships of density with  
 275 soil pH and organic carbon content were hump-shaped, suggesting that intermediate values of  
 276 these parameters are optimal for springtails (Extended Data Fig. 8), which is also observed  
 277 for nematodes<sup>18</sup>. Existing evidence points to soil properties as key drivers of microfauna  
 278 (nematodes)<sup>6</sup>, climate as a key driver of macrofauna (earthworms)<sup>7</sup> and a combination of both  
 279 as drivers of mesofauna (springtails) at the global scale.

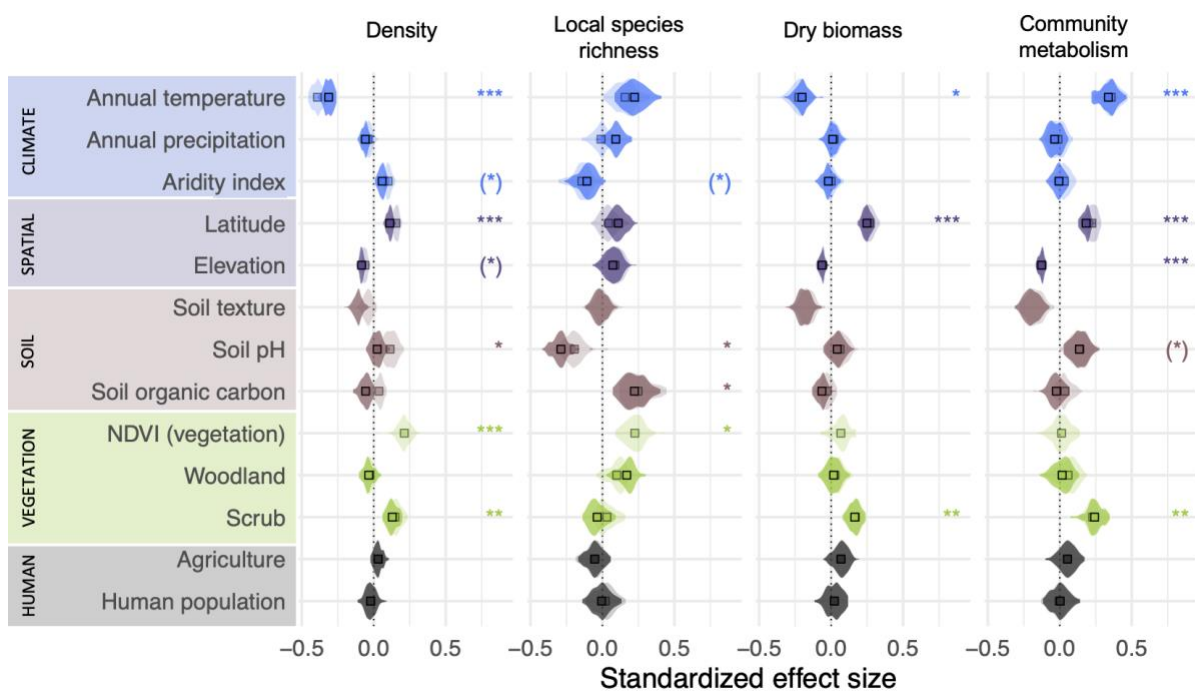

280

281 **Fig. 3 | Environmental drivers of springtail communities at the global scale.** Standardized  
282 effect sizes for direct (semi-transparent colour) and total (direct and indirect, solid colour)  
283 effects from path analysis are shown for density ( $R^2 = 0.36 \pm 0.01$ ,  $n = 723$  per iteration),  
284 local species richness ( $R^2 = 0.20 \pm 0.02$ ,  $n = 352$ ), biomass ( $R^2 = 0.40 \pm 0.02$ ,  $n = 568$ ) and  
285 community metabolism ( $R^2 = 0.17 \pm 0.02$ ,  $n = 533$ ). Mean values (squares) and data  
286 distribution (violins) are shown. Asterisks denote factors with a significant direct effect ( $p <$   
287  $0.05$ ) on a given springtail community metric for  $>25\%$  (\*),  $>50\%$  (\*),  $>75\%$  (\*\* and  $>95\%$  (\*\*\*) of  
288 iterations.

289

290 Springtail density and biomass were lower in woodlands, grasslands and agricultural sites in  
291 comparison to scrub-dominated landscapes (Fig. 3). In contrast to previous global  
292 assessments of soil animal biodiversity<sup>18,19</sup>, tundra was extensively sampled in our dataset ( $n$   
293  $= 253$ ; Fig. 1a), and densities  $>1$  million individuals per square meter were recorded at 12  
294 independent sites. The high species richness of tundra communities (Fig. 2a), suggests a long  
295 evolutionary history of springtails in cold climates; indeed, they are currently the most  
296 taxonomically represented group of terrestrial arthropods in the Arctic<sup>35</sup> and the Antarctic<sup>37</sup>.  
297 Tundra remains under snow cover for most of the year, flourishing during summer when high  
298 springtail densities were recorded. During winter, springtails survive under the snow using  
299 remarkable adaptations to subzero temperatures (dehydration<sup>38</sup> and ‘supercooling’<sup>38</sup>).

300 Importantly, tundra soils contain a major proportion of the total soil organic matter and  
301 microbial biomass stored in the terrestrial biosphere<sup>16</sup>. As climate warming alters carbon  
302 cycling in the tundra<sup>39</sup>, longer active periods of springtails could accelerate soil carbon  
303 release to the atmosphere in polar regions<sup>40</sup>.

304 Across tropical ecosystems in the Amazon basin, equatorial Africa and Southeast Asia, low  
305 density and biomass of springtails were recorded and extrapolated (Fig. 2a, Extended Data

306 Figs. 4 and 6). Mesofauna in general have low abundances in tropical ecosystems, where the  
307 litter layer is shallow and larger soil-associated invertebrates, such as earthworms, termites  
308 and ants, play a more important role<sup>24</sup>. Our study supports this trend also found in recent  
309 global assessments of other soil invertebrates<sup>18,19,41</sup>. However, considering the high mass-  
310 specific metabolism of springtails and high predation rates in tropical communities<sup>7,8,22</sup>, a  
311 quantitative comparison of energy flows and stocks across latitudes and groups of soil fauna  
312 is needed.

313 Interestingly, we found no pronounced influence of agriculture and human population on  
314 springtail communities at the global scale; agriculture tended to have a positive impact on  
315 biomass but a negative impact on species richness (Fig. 3). Agricultural sites had similar  
316 springtail densities compared to woodlands and grasslands in the temperate zone (ca. 15-25k  
317 individuals m<sup>-2</sup>; Extended Data Fig. 3), which may be explained by large variation in  
318 management within each of these habitat types. Some springtail species effectively survive in  
319 agricultural fields<sup>33</sup>, where they are involved in nutrient cycling and serve as biocontrol  
320 agents by grazing on pathogenic fungi<sup>42</sup> and supporting arthropod predators<sup>43</sup>. Springtails are  
321 also commonly found in urban areas<sup>32</sup>. However, the negative trend in species richness at  
322 human-modified sites suggests that intensive land use may reduce springtail diversity, which  
323 is indeed often recorded<sup>32,33,44</sup>.

324 The only variable that was positively associated with both density and local species richness  
325 of springtails, was NDVI (as a proxy for vegetation richness), reinforcing the close  
326 connection between springtail communities and the vegetation<sup>20</sup>. Overall, high local species  
327 richness was predicted in warm, acidic woodlands with high soil organic carbon stocks (Fig.  
328 3) and geospatial extrapolation emphasized tropical regions and some boreal forests in North  
329 America and Eurasia as springtail diversity hotspots (Extended Data Fig. 5). In our dataset,  
330 sites with the highest extrapolated local species richness (i.e., >100 species) were located in



331 European woodlands (Czech Republic, Slovakia). However, this picture may be biased by the  
332 historical clustering of taxonomic expertise in Europe<sup>5</sup>. Outside Eurasia, species-rich sites  
333 (i.e. 60-80 species) were located in Vietnamese monsoon forests and some Brazilian  
334 rainforests, but 70-90% of species in tropical communities remain undescribed<sup>45,46</sup>. Thus,  
335 despite low springtail density, tropical forests contribute substantially to global springtail  
336 diversity but the full extent of this contribution is unknown.

337 Our extrapolations suggest that there are c.  $2 \times 10^{18}$  soil springtails globally and their total  
338 biomass comprises c. 29 Mt C (c. 200 Mt fresh weight), with respiration of c. 16 Mt C month<sup>-1</sup>  
339 (which is c. 0.2% of the global soil respiration<sup>9</sup>). Our biomass estimates are very similar to  
340 the global estimated biomass of nematodes (c. 31 Mt C<sup>18</sup>), but lower than that of earthworms  
341 (c. 200 Mt C<sup>19</sup>), and exceeding by far that of all wild terrestrial vertebrates (c. 9 Mt C)<sup>6</sup>,  
342 demonstrating that springtails are among the most abundant and ubiquitous animals on Earth.

343 Overall, our global dataset on soil springtail communities synthesized the work of soil  
344 zoologists across the globe. It presents another milestone towards understanding the  
345 functional composition of global soil biodiversity. Being highly abundant in polar regions  
346 and some human-modified landscapes, springtails are facing two main global change  
347 frontiers: warming in the polar regions, and land-use change and urbanization in temperate  
348 and tropical regions. While the global abundance and biomass of springtails may decline with  
349 climate warming in the coming decades, their global activity may remain unchanged. The  
350 global diversity of springtails will depend on the balance between anthropogenic  
351 transformations and conservation efforts of biomes worldwide.

352



## 353 References

- 354 1. FAO, ITPS, GSBI, SCBD & EC. *State of knowledge of soil biodiversity Status, challenges and*  
355 *potentialities, Report 2020*. (FAO, 2020). doi:10.4060/cb1928en.
- 356 2. Bardgett, R. D. & van der Putten, W. H. Belowground biodiversity and ecosystem functioning.  
357 *Nature* **515**, 505–511 (2014).
- 358 3. Rusek, J. Biodiversity of Collembola and their functional role in the ecosystem. *Biodiversity and*  
359 *Conservation* **7**, 1207–1219 (1998).
- 360 4. Hopkin, S. P. *Biology of springtails: (Insecta: Collembola)*. (Oxford Science Publications, 1997).
- 361 5. Potapov, A. *et al.* Towards a global synthesis of Collembola knowledge – challenges and  
362 potential solutions. *Soil Organisms* **92**, 161–188 (2020).
- 363 6. Bar-On, Y. M., Phillips, R. & Milo, R. The biomass distribution on Earth. *Proceedings of the*  
364 *National Academy of Sciences* **115**, 6506–6511 (2018).
- 365 7. Rall, B. C. *et al.* Universal temperature and body-mass scaling of feeding rates. *Philosophical*  
366 *Transactions of the Royal Society B: Biological Sciences* **367**, 2923–2934 (2012).
- 367 8. Roslin, T. *et al.* Higher predation risk for insect prey at low latitudes and elevations. *Science* **356**,  
368 742–744 (2017).
- 369 9. Huang, N. *et al.* Spatial and temporal variations in global soil respiration and their relationships  
370 with climate and land cover. *Science Advances* **6**, eabb8508 (2020).
- 371 10. Wall, D. H. *et al.* Global decomposition experiment shows soil animal impacts on decomposition  
372 are climate-dependent. *Global Change Biology* **14**, 2661–2677 (2008).
- 373 11. Handa, I. T. *et al.* Consequences of biodiversity loss for litter decomposition across biomes.  
374 *Nature* **509**, 218–221 (2014).
- 375 12. Wagg, C., Bender, S. F., Widmer, F. & van der Heijden, M. G. A. Soil biodiversity and soil  
376 community composition determine ecosystem multifunctionality. *Proceedings of the National*  
377 *Academy of Sciences* **111**, 5266–5270 (2014).
- 378 13. Delgado-Baquerizo, M. *et al.* Multiple elements of soil biodiversity drive ecosystem functions  
379 across biomes. *Nature Ecology & Evolution* **4**, 210–220 (2020).

- 380 14. Geisen, S., Wall, D. H. & van der Putten, W. H. Challenges and opportunities for soil biodiversity  
381 in the Anthropocene. *Current Biology* **29**, R1036–R1044 (2019).
- 382 15. Guerra, C. A. *et al.* Tracking, targeting, and conserving soil biodiversity. *Science* **371**, 239–241  
383 (2021).
- 384 16. Crowther, T. W. *et al.* The global soil community and its influence on biogeochemistry. *Science*  
385 **365**, (2019).
- 386 17. Bahram, M. *et al.* Structure and function of the global topsoil microbiome. *Nature* **560**, 233–237  
387 (2018).
- 388 18. van den Hoogen, J. *et al.* Soil nematode abundance and functional group composition at a global  
389 scale. *Nature* (2019) doi:10.1038/s41586-019-1418-6.
- 390 19. Phillips, H. R. P. *et al.* Global distribution of earthworm diversity. *Science* **366**, 480–485 (2019).
- 391 20. Fujii, S., Saitoh, S. & Takeda, H. Effects of rhizospheres on the community composition of  
392 Collembola in a temperate forest. *Applied Soil Ecology* **83**, 109–115 (2014).
- 393 21. Filser, J. *et al.* Soil fauna: key to new carbon models. *Soil* **2**, 565–582 (2016).
- 394 22. Brown, J. H., Gillooly, J. F., Allen, A. P., Savage, V. M. & West, G. B. Toward a metabolic  
395 theory of ecology. *Ecology* **85**, 1771–1789 (2004).
- 396 23. Hooper, D. U. *et al.* Effects of biodiversity on ecosystem functioning: A consensus of current  
397 knowledge. *Ecological Monographs* **75**, 3–35 (2005).
- 398 24. Petersen, H. & Luxton, M. A comparative analysis of soil fauna populations and their role in  
399 decomposition processes. *Oikos* **39**, 288–388 (1982).
- 400 25. Hillebrand, H. On the Generality of the Latitudinal Diversity Gradient. *The American Naturalist*  
401 **163**, 192–211 (2004).
- 402 26. Kreft, H. & Jetz, W. Global patterns and determinants of vascular plant diversity. *Proceedings of*  
403 *the National Academy of Sciences* **104**, 5925–5930 (2007).
- 404 27. Enquist, B. J., Kerkhoff, A. J., Huxman, T. E. & Economo, E. P. Adaptive differences in plant  
405 physiology and ecosystem paradoxes: insights from metabolic scaling theory. *Global Change*  
406 *Biology* **13**, 591–609 (2007).

- 407 28. Fierer, N., Strickland, M. S., Liptzin, D., Bradford, M. A. & Cleveland, C. C. Global patterns in  
408 belowground communities. *Ecology Letters* **12**, 1238–1249 (2009).
- 409 29. Kærsgaard, C. W., Holmstrup, M., Malte, H. & Bayley, M. The importance of cuticular  
410 permeability, osmolyte production and body size for the desiccation resistance of nine species of  
411 Collembola. *Journal of Insect Physiology* **50**, 5–15 (2004).
- 412 30. Janion-Schepers, C. *et al.* Basal resistance enhances warming tolerance of alien over indigenous  
413 species across latitude. *Proceedings of the National Academy of Sciences* **115**, 145–150 (2018).
- 414 31. Peguero, G. *et al.* Fast attrition of springtail communities by experimental drought and richness–  
415 decomposition relationships across Europe. *Global Change Biology* **25**, 2727–2738 (2019).
- 416 32. Joimel, S. *et al.* Urban and industrial land uses have a higher soil biological quality than expected  
417 from physicochemical quality. *Science of The Total Environment* **584–585**, 614–621 (2017).
- 418 33. Filser, J., Mebes, K.-H., Winter, K., Lang, A. & Kampichler, C. Long-term dynamics and  
419 interrelationships of soil Collembola and microorganisms in an arable landscape following land  
420 use change. *Geoderma* **105**, 201–221 (2002).
- 421 34. Phillips, H. R. *et al.* Response to Comment on “Global distribution of earthworm diversity”.  
422 *Science* **371**, (2021).
- 423 35. Babenko, A. B. The structure of springtail fauna (Collembola) of the Arctic. *Entomological*  
424 *Review* **85**, 878–890 (2005).
- 425 36. Cameron, E. K. *et al.* Global mismatches in aboveground and belowground biodiversity.  
426 *Conservation Biology* (2019).
- 427 37. Baird, H. P., Janion-Schepers, C., Stevens, M. I., Leihy, R. I. & Chown, S. L. The ecological  
428 biogeography of indigenous and introduced Antarctic springtails. *Journal of Biogeography* **46**,  
429 1959–1973 (2019).
- 430 38. Sørensen, J. G. & Holmstrup, M. Cryoprotective dehydration is widespread in Arctic springtails.  
431 *Journal of Insect Physiology* **57**, 1147–1153 (2011).
- 432 39. Box, J. E. *et al.* Key indicators of Arctic climate change: 1971–2017. *Environmental Research*  
433 *Letters* **14**, 045010 (2019).

- 434 40. Sørensen, L. I., Holmstrup, M., Maraldo, K., Christensen, S. & Christensen, B. Soil fauna  
435 communities and microbial respiration in high Arctic tundra soils at Zackenberg, Northeast  
436 Greenland. *Polar Biology* **29**, 189–195 (2006).
- 437 41. Johnston, A. S. A. & Sibly, R. M. Multiple environmental controls explain global patterns in soil  
438 animal communities. *Oecologia* **192**, 1047–1056 (2020).
- 439 42. Goncharov, A. A. *et al.* Detrital subsidy alters the soil invertebrate community and reduces  
440 infection of winter wheat seedlings by Fusarium wilt. *Applied Soil Ecology* **163**, 103914 (2021).
- 441 43. von Berg, K., Thies, C., Tschardt, T. & Scheu, S. Changes in herbivore control in arable fields  
442 by detrital subsidies depend on predator species and vary in space. *Oecologia* **163**, 1033–1042  
443 (2010).
- 444 44. Tsiafouli, M. A. *et al.* Intensive agriculture reduces soil biodiversity across Europe. *Global*  
445 *Change Biology* **21**, 973–985 (2015).
- 446 45. Shveenkova, Y. Springtail communities (Collembola, Hexapoda). in *Structure and Functions of*  
447 *Soil Communities of a Monsoon Tropical Forest (Cat Tien National Park, southern Vietnam)* (ed.  
448 Tiunov, A. V.) 131–147 (KMK Scientific Press, 2011).
- 449 46. Deharveng, L. & Bedos, A. Factors influencing diversity of soil Collembola in a tropical  
450 mountane forest (Doi Inthanon, Northern Thailand). in *Soil biota, nutrient cycling and farming*  
451 *systems* (eds. Paoletti, M. G., Foissner, W. & Coleman, D. C.) (Lewis Publishers, 1993).

452

## 453 Methods

454 **Data reporting.** The data underpinning this study is a compilation of existing datasets and  
455 therefore, no statistical methods were used to predetermine sample size, the experiments were  
456 not randomized and the investigators were not blinded to allocation during experiments and  
457 outcome assessment. The measurements were taken from distinct samples, repeated  
458 measurements from the same sites were averaged.

459 **Data acquisition.** Data were primarily collected from individual archives of contributing co-  
460 authors. Both published and unpublished data were collected, using raw data whenever  
461 possible entered into a common template. In addition, data available from Edaphobase<sup>47</sup> was  
462 included. The following minimum set of variables was collected: collectors, collection  
463 method (including sampling area and depth), extraction method, identification precision and  
464 resources, collection date, latitude and longitude, vegetation type (generalized as grassland,  
465 scrub, woodland, agriculture and ‘other’ for the analysis), and abundances of springtail taxa  
466 found in each soil sample (or sampling site). Underrepresented geographical areas (Africa,  
467 South America, Australia and Southeast Asia) were specifically targeted by a literature search  
468 in the Web of Science database using the keywords ‘springtail’ or ‘Collembola’, ‘density’ or  
469 ‘abundance’ or ‘diversity’, and the region of interest; data were acquired from all found  
470 papers if the minimum information listed above was provided. In total, 363 datasets  
471 comprising 2,783 sites were collected and collated into a single dataset (Extended Data Fig.  
472 1).

473 **Calculation of community parameters.** Community parameters were calculated at the site  
474 level. Here, we defined a site as a locality that hosts a defined springtail community, is  
475 covered by a certain vegetation type and has a maximum spatial extent (diameter) of several  
476 hundred meters, making species co-occurrence and interactions plausible. To calculate  
477 density, numerical abundance in all samples was averaged and recalculated per square meter  
478 using the sampling area. Springtail communities were assessed predominantly during active  
479 vegetation periods (i.e., spring, summer and autumn in temperate and boreal biomes, and  
480 summer in polar biomes). Our estimations of community parameters therefore refer to the  
481 most favourable conditions (peak yearly densities). This seasonal sampling bias is likely to  
482 have little effect on our conclusions, since most springtails survive during cold periods<sup>38,48</sup>.

483 Finally, we used mean annual temperatures<sup>49</sup> to estimate the seasonal mean community  
484 metabolism (described below).

485 All data analyses were conducted in R v. 4.0.2<sup>50</sup> with RStudio interface v. 1.4.1103 (RStudio,  
486 PBC), unless otherwise mentioned. To calculate local species richness, we used data  
487 identified to species or morphospecies level. Since the sampling effort varied among studies,  
488 we extrapolated species richness using rarefaction curves based on individual samples with  
489 the Chao estimator<sup>51</sup> in the *vegan* package<sup>52</sup>. For some sites, sample-level data were not  
490 available in the original publications, but an extensive sampling effort was made. In such  
491 cases, we predicted extrapolated species richness based on the completeness (ratio of  
492 observed to extrapolated richness) recorded at sites where sample-level data were available  
493 (only sites with 5 or more samples were used for the prediction). We built a binomial model  
494 to predict completeness in sites where no sample-level data were available (435 sites in  
495 Europe, 15 in Australia, 6 in South America, 4 in Asia, and 3 in Africa) using latitude and the  
496 number of samples taken at a site as predictors.

497 To calculate biomass, we first cross-checked all taxonomic names with the *collembola.org*  
498 checklist<sup>53</sup> using fuzzy matching algorithms (*fuzzyjoin* R package<sup>54</sup>) to align taxonomic  
499 names and correct typos. Then we merged taxonomic names with a dataset on body lengths  
500 compiled from the BETSI database<sup>55</sup>, a personal database of Matty P. Berg, and additional  
501 expert contributions. We used average body lengths for the genus level (body size data on  
502 432 genera) since data at the species level were not available for many species and  
503 morphospecies, and species within most springtail genera had similar body size ranges. Dry  
504 and fresh body masses were calculated from body length using a set of group-specific length-  
505 mass regressions (Extended Data Table 1)<sup>56,57</sup> and the results of different regressions applied  
506 to the same morphogroup were averaged. Dry mass was recalculated to fresh mass using  
507 corresponding group-specific coefficients<sup>56</sup>. We used fresh mass to calculate individual

508 metabolic rates<sup>58</sup> and account for the mean annual topsoil (0-5 cm) temperature at a given  
509 site<sup>59</sup>. Group-specific metabolic coefficients for insects (including Collembola) were used for  
510 the calculation: normalization factor ( $i_0$ )  $\ln(21.972)$  [ $\text{J h}^{-1}$ ], allometric exponent ( $a$ ) 0.759, and  
511 activation energy ( $E$ ) 0.657 [ $\text{eV}$ ]<sup>58</sup>. Community-weighted (specimen-based) mean individual  
512 dry masses and metabolic rates were calculated for each sample and then averaged by site  
513 after excluding 10% of maximum and minimum values as outlier samples with small  
514 sampling areas, which have a high probability of randomly including large individuals. To  
515 calculate site-level biomasses and community metabolism, we summed masses or metabolic  
516 rates of individuals, averaged them across samples, and recalculated them per unit area ( $\text{m}^2$ ).

517 **Parameter uncertainties.** Our biomass and community metabolism approximations contain  
518 several assumptions and ignore latitudinal variation in body sizes within taxonomic groups<sup>60</sup>.  
519 Nevertheless, latitudinal differences in springtail density (30-fold), environmental  
520 temperature (from  $-17.0$  to  $+27.6^\circ\text{C}$ ), and genus-level community compositions (there are  
521 only few common genera among polar regions and the tropics)<sup>53</sup> are higher than the  
522 uncertainties introduced by indirect parameter estimations, which allowed us to detect global  
523 trends. Although most springtails are concentrated in the litter and uppermost soil layers<sup>24</sup>,  
524 their vertical distribution depends on the particular ecosystem<sup>61</sup>. Since sampling methods are  
525 usually ecosystem-specific (i.e. sampling is done deeper in soils with developed organic  
526 layers), we treated the methods used by the original data collectors as representative of a  
527 given ecosystem. Under this assumption, we might have underestimated the number of  
528 springtails in soils with deep organic horizons, so our global estimates are conservative and  
529 we would expect true global density and biomass to be slightly higher. To minimize these  
530 effects, we excluded sites where the estimations were likely to be unreliable (see data  
531 selection below).



532 **Data selection.** Only data collection methods allowing for area-based recalculation (e.g.  
533 Tullgren or Berlese funnels) were used for analysis. Data from artificial habitats, coastal  
534 ecosystems, caves, canopies, snow surfaces, and strong experimental manipulations beyond  
535 the bounds of naturally occurring conditions were excluded (Extended Data Fig. 1). To  
536 ensure data quality, we performed a two-step quality check: technical selection and expert  
537 evaluation. Collected data varied according to collection protocols, such as sampling depth  
538 and the microhabitats (layers) considered. To technically exclude unreliable density  
539 estimations, we explored data with a number of diagnostic graphs (see Supplementary Data  
540 Cleaning Protocol) and filtered it, excluding the following: (1) All woodlands where only soil  
541 or only litter was considered; (2) All scrub ecosystems where only ground cover (litter or  
542 mosses) was considered; (3) Agricultural sites in temperate zones where only soil with  
543 sampling depth <10 cm was considered. Additionally, 10% of the lowest values were  
544 individually checked and excluded if density was unrealistically low for the given ecosystem  
545 (outliers with density over three times lower than 1% percentile within each ecosystem type).  
546 In total, 237 sites were excluded from density, and 394 sites from biomass, and community  
547 metabolism analyses based on these criteria. For the local species richness estimates, we  
548 removed all extrapolations based on sites with fewer than three samples and no  
549 (morpho)species identifications (647 sites; Extended Data Fig. 1).

550 **Data expert evaluation.** We performed manual expert evaluation of every contributed  
551 dataset. Evaluation was done by an expert board of springtail specialists, each with extensive  
552 research experience in a certain geographic area. Each dataset was scored separately for  
553 density and species richness as either trustworthy, acceptable, or unreliable. Density  
554 estimation quality was assessed using information about the sampling and extraction method  
555 and the density estimation itself. Species richness estimation quality was assessed using  
556 information about the identification key, experience of the person who identified the material,

557 species (taxa) list, and the species richness estimation itself. Based on the expert opinions,  
558 unreliable estimates of density (together with biomass and community metabolism) and  
559 species richness were excluded (Extended Data Fig. 1). The resulting final dataset included  
560 2,470 sites and 43,601 samples<sup>62</sup> with a median of six samples collected at each site. The  
561 dataset comprised 2,210 sites with density estimation (69 - 2,181,600 individuals m<sup>-2</sup>), 2,053  
562 sites with mean fresh body mass (1.8 - 3,110 µg), mean metabolic rate (0.028 - 2.4 mJ h<sup>-1</sup>),  
563 dry biomass (0.5 - 92,943 mg m<sup>-2</sup>), fresh biomass (1.6 - 277,028 mg m<sup>-2</sup>) and community  
564 metabolism estimations (0.03 - 999.68 J h<sup>-1</sup>), and 1,735 sites with local species richness  
565 estimation (1 - 136.7 species; Extended Data Figs. 1 and 2).

566 **Data transformation.** All parameters except for extrapolated local species richness were  
567 highly skewed (e.g., density had a global median of 21,016 individuals m<sup>-2</sup> and a mean of  
568 60,454 individuals m<sup>-2</sup>) and we applied log<sub>10</sub>-transformation prior to analysis. This greatly  
569 improved the fit of all statistical analyses.

570 **Latitudinal and ecosystem trends.** To explore changes in springtail communities with  
571 latitude, we sliced the global latitudinal gradient into 5-degree bins and calculated average  
572 parameters across sites in each bin after trimming to ensure the same statistical weight for  
573 each latitudinal bin while plotting the gradient. The latitudinal gradient was plotted with  
574 *ggplot2*<sup>63</sup>, and quadratic smoothers were used to illustrate trends. Mean parameters of  
575 springtail communities were compared across ecosystem types using a linear model and  
576 multiple comparisons with the Tukey HSD test using *HSD.test* in the *agricolae* package<sup>64</sup>.  
577 Habitats were classified according to the vegetation types. Climates were classified as polar  
578 (beyond the polar circles, i.e., more than 66.5 and less than -66.5 degrees), temperate (from  
579 the polar circles to the tropics of Capricorn/Cancer, i.e. to 23.5 and -23.5 degrees) and  
580 tropical (in between 23.5 and -23.5 degrees). Habitats and climates were combined to  
581 produce ecosystem types. For the analysis, only well-represented ecosystem types were

582 retained: polar scrub (n = 253), polar grassland (n = 39), polar woodland (n = 28), temperate  
583 woodland (n = 907), temperate scrub (n = 104), temperate grassland (n = 445), temperate  
584 agriculture (n = 374), tropical agriculture (n = 68) and tropical forest (n = 141; Extended Data  
585 Fig. 3).

586 **Selection of environmental predictors.** To assess the drivers of global distributions of  
587 springtail community metrics, we pre-selected variables with a known ecological effect on  
588 springtail communities (based on expert opinions) and constructed a hypothetical relationship  
589 diagram (Extended Data Fig. 9a). Environmental data were very heterogeneous across the  
590 springtail studies, so we used globally available climatic and other environmental layers;  
591 these included layers bearing climatic (mean annual temperature, temperature seasonality,  
592 temperature annual range, mean annual precipitation, precipitation seasonality, precipitation  
593 of the driest quarter<sup>65</sup>, aridity index<sup>66</sup>), topographic (elevation, roughness<sup>67</sup>), vegetative and  
594 land cover (aboveground biomass<sup>68</sup>, tree cover<sup>69</sup>, Net Primary Production, Normalized  
595 Difference Vegetation Index [NDVI]<sup>70</sup>), topsoil physicochemical (0-15 cm depth C to N  
596 ratio, pH, clay, sand, coarse fragments, organic carbon, bulk density<sup>71</sup>) and human population  
597 density<sup>72</sup>.

598 **Geospatial global projections.** To create global spatial predictions of springtail density,  
599 species richness, biomass, and community metabolism, we followed the approach previously  
600 used for nematodes<sup>18,73</sup> that is based on spatial associations of community parameters with  
601 global environmental information. A Random Forest algorithm was applied to identify the  
602 spatial associations and extrapolate local observations to the global scale<sup>18,73</sup>. After retrieving  
603 the environmental variable values for each location, we trained 18 model versions, each with  
604 different hyperparameter settings, i.e., variables per split (range: 2 - 7); minimum leaf  
605 population (range: 3 - 5). To minimize the potential bias of a single model, we used an  
606 ensemble of the top 10 best-performing models, selected based on the coefficient of

607 determination ( $R^2$ ), to create global predictions of each of the community parameters.

608 Geographical regions with climatic conditions poorly represented by our sites and without

609 NPP data were excluded from the extrapolation (e.g., Sahara, Arabian desert, Himalayas). We

610 evaluated our extrapolation quality based on spatial approximations of interpolation versus

611 extrapolation<sup>73</sup>. In this approach, we first determined the range of environmental conditions

612 represented by the observations. Next, we classified all pixels to fall within or outside the

613 training space, in univariate and multivariate space. For the latter, we first transformed the

614 data into principal component space, and selected the first 11 PC axes, collectively explaining

615 90% of the variation. Finally, we classified pixels to fall within or outside the convex hulls

616 drawn around each possible bivariate combination of these 11 PC axes; pixels that fell

617 outside the convex hulls in >90% of cases were masked on the map.

618 To estimate spatial variability of our predictions while accounting for the spatial sampling

619 bias in our data (Fig. 1a) we performed a spatially stratified bootstrapping procedure. We

620 used the relative area of each IPBES<sup>74</sup> region (i.e., Europe and Central Asia, Asia and the

621 Pacific, Africa, and the Americas) to resample the original dataset, creating 100 bootstrap

622 resamples. Each of these resamples was used to create a global map, which was then reduced

623 to create mean, standard deviation, 95% confidence interval, and coefficient of variation

624 maps (Extended Data Figs. 4-7).

625 Global biomass, abundance, and community metabolism of springtails were estimated by

626 summing predicted values for each 30 arcsec pixel<sup>18</sup>. Global community metabolism was

627 recalculated from joule to mass carbon by assuming 1 kg fresh mass =  $7 \times 10^6$  J<sup>75</sup>, an average

628 water proportion in springtails of 70%<sup>56</sup>, and an average carbon concentration of 45%

629 (calculated from 225 measurements across temperate forest ecosystems)<sup>76</sup>.

630 **Path analysis.** To reveal the drivers of springtail communities at the global scale, we

631 performed a path analysis. After filtering the selected environmental variables (see above)

632 according to their global availability and collinearity, 13 variables were used (Extended Data  
633 Fig. 9b): mean annual temperature, mean annual precipitation (CHELSA database<sup>65</sup>), aridity  
634 (CGIAR database<sup>66</sup>), soil pH, sand and clay contents combined (sand and clay contents were  
635 co-linear in our dataset), soil organic carbon content (SoilGrids database<sup>71</sup>), NDVI (MODIS  
636 database<sup>70</sup>), human population density (GPWv4 database<sup>72</sup>), latitude, elevation<sup>67</sup>, and  
637 vegetation cover (woodland, scrub, or agriculture; grasslands were represented as the  
638 combination of woodland, scrub, and agriculture absent). Before running the analysis, we  
639 performed the Rosner's generalized extreme Studentized deviate test in the *EnvStats*  
640 package<sup>77</sup> to exclude extreme outliers and we z-standardized all variables (Supplementary R  
641 Code).

642 Separate piecewise structural equation models were run to predict density, dry biomass,  
643 community metabolism, and local species richness in the *lavaan* package<sup>78</sup>. To account for  
644 the spatial clustering of our data in Europe, instead of running a model for the entire dataset,  
645 we divided the data by the IPBES<sup>74</sup> geographical regions and selected a random subset of  
646 sites for Eurasia, such that only twice the number of sites were included in the model as the  
647 second most represented region. We ran the path analysis 99 times for each community  
648 parameter with different Eurasian subsets (density had  $n = 723$  per iteration, local species  
649 richness had  $n = 352$ , dry biomass had  $n = 568$ , and community metabolism had  $n = 533$ ). We  
650 decided to keep the share of the Eurasian dataset larger than other regions to increase the  
651 number of sites per iteration and validity of the models. The Eurasian dataset also had the  
652 best data quality among all regions and a substantial reduction in datasets from Eurasia would  
653 result in a low weight for high quality data. We additionally ran a set of models in which the  
654 Eurasian dataset was represented by the same number of sites as the second-most represented  
655 region, which yielded similar effect directions for all factors, but slightly higher variations  
656 and fewer consistently significant effects. In the paper, only the first version of analysis is

657 presented. To illustrate the results, we averaged effect sizes for the paths across all iterations  
658 and presented the distribution of these effect sizes using mirrored Kernel density estimation  
659 (violin) plots. We marked and discussed effects that were significant at  $p < 0.05$  in more than  
660 a given number of iterations (arbitrary thresholds were set to 25%, 50%, 75% and 95% of  
661 iterations; Fig. 3).

662

### 663 **Data availability statement.**

664 The data that support the findings of this study are available under CC-BY 4.0 license from  
665 Figshare: <https://doi.org/10.6084/m9.figshare.16850419>; high-resolution maps can be  
666 assessed at <https://doi.org/10.6084/m9.figshare.16850446>.

667

### 668 **Code availability statement**

669 Programming code for the path analysis and the geospatial modelling is available under CC-  
670 BY 4.0 from Figshare: <https://doi.org/10.6084/m9.figshare.16850419>.

671

## 672 **Methods references**

- 673 47. Burkhardt, U. *et al.* The Edaphobase project of GBIF-Germany—A new online soil-zoological  
674 data warehouse. *Applied Soil Ecology* **83**, 3–12 (2014).
- 675 48. Sømme, L. Supercooling and winter survival in terrestrial arthropods. *Comparative Biochemistry*  
676 *and Physiology Part A: Physiology* **73**, 519–543 (1982).
- 677 49. Fick, S. E. & Hijmans, R. J. WorldClim 2: new 1-km spatial resolution climate surfaces for global  
678 land areas. *International Journal of Climatology* **37**, 4302–4315 (2017).
- 679 50. R Core Team. *R: A language and environment for statistical computing*. (R Foundation for  
680 Statistical Computing, 2019).

- 681 51. Chao, A. & Jost, L. Coverage-based rarefaction and extrapolation: standardizing samples by  
682 completeness rather than size. *Ecology* **93**, 2533–2547 (2012).
- 683 52. Oksanen, J. *et al.* Vegan: community ecology package. R package version 1.17-6. (2011).
- 684 53. Bellinger, P. F., Christiansen, K. A. & Janssens, F. Checklist of the Collembola of the World.  
685 <http://www.collembola.org/> (2020).
- 686 54. Robinson, D. *fuzzyjoin: Join Tables Together on Inexact Matching*. (2020).
- 687 55. Pey, B. *et al.* A Thesaurus for Soil Invertebrate Trait-Based Approaches. *PLoS ONE* **9**, e108985  
688 (2014).
- 689 56. Petersen, H. Estimation of dry weight, fresh weight, and calorific content of various Collembolan  
690 species. *Pedobiologia* **15**, 222–243 (1975).
- 691 57. Tanaka, M. Ecological studies on communities of soil Collembola in Mt. Sobo, southwest Japan.  
692 *Japanese Journal of Ecology* **20**, 102–110 (1970).
- 693 58. Ehnes, R. B., Rall, B. C. & Brose, U. Phylogenetic grouping, curvature and metabolic scaling in  
694 terrestrial invertebrates: Invertebrate metabolism. *Ecology Letters* **14**, 993–1000 (2011).
- 695 59. Lembrechts, J. *et al.* *Global maps of soil temperature*. <https://osf.io/pksqw> (2021)  
696 doi:10.32942/osf.io/pksqw.
- 697 60. Bonfanti, J. *et al.* Intraspecific body size variability in soil organisms at a European scale:  
698 implications for functional biogeography. *Functional ecology* **32**, 2562–2570 (2018).
- 699 61. Potapov, A. M. *et al.* Arthropods in the subsoil: Abundance and vertical distribution as related to  
700 soil organic matter, microbial biomass and plant roots. *European Journal of Soil Biology* **82**, 88–  
701 97 (2017).
- 702 62. Potapov, A. M., Guerra, C. A. & van den Hoogen, J. #GlobalCollembola: site-level database and  
703 analyses. *Figshare*. Dataset. <https://doi.org/10.6084/m9.figshare.16850419.v1>
- 704 63. Wickham, H. *ggplot2: elegant graphics for data analysis*. (Springer-Verlag, 2009).
- 705 64. Mendiburu, F. de. *agricolae: Statistical Procedures for Agricultural Research*. (2020).
- 706 65. Karger, D. N. *et al.* Climatologies at high resolution for the earth’s land surface areas. *Scientific*  
707 *Data* **4**, 170122 (2017).



- 708 66. Zomer, R. J., Trabucco, A., Bossio, D. A. & Verchot, L. V. Climate change mitigation: A spatial  
709 analysis of global land suitability for clean development mechanism afforestation and  
710 reforestation. *Agriculture, Ecosystems & Environment* **126**, 67–80 (2008).
- 711 67. Amatulli, G. *et al.* A suite of global, cross-scale topographic variables for environmental and  
712 biodiversity modeling. *Scientific Data* **5**, 180040 (2018).
- 713 68. Santoro, M. GlobBiomass - global datasets of forest biomass. (2018)  
714 doi:10.1594/PANGAEA.894711.
- 715 69. Hansen, M. C. *et al.* High-Resolution Global Maps of 21st-Century Forest Cover Change. *Science*  
716 **342**, 850–853 (2013).
- 717 70. Tuanmu, M.-N. & Jetz, W. A global 1-km consensus land-cover product for biodiversity and  
718 ecosystem modelling. *Global Ecology and Biogeography* **23**, 1031–1045 (2014).
- 719 71. Hengl, T. *et al.* SoilGrids250m: Global gridded soil information based on machine learning.  
720 *PLOS ONE* **12**, e0169748 (2017).
- 721 72. Center for International Earth Science Information Network - CIESIN - Columbia University.  
722 Gridded Population of the World, Version 4 (GPWv4): Population Density Adjusted to Match  
723 2015 Revision UN WPP Country Totals. (2016).
- 724 73. van den Hoogen, J. *et al.* *A geospatial mapping pipeline for ecologists.*  
725 <http://biorxiv.org/lookup/doi/10.1101/2021.07.07.451145> (2021) doi:10.1101/2021.07.07.451145.
- 726 74. IPBES. *Summary for policymakers of the global assessment report on biodiversity and ecosystem*  
727 *services of the Intergovernmental Science-Policy Platform on Biodiversity and Ecosystem*  
728 *Services.* (2019).
- 729 75. Peters, R. H. *The ecological implications of body size.* (Cambridge University Press, 1983).
- 730 76. Potapov, A. M., Tiunov, A. V. & Scheu, S. Uncovering trophic positions and food resources of  
731 soil animals using bulk natural stable isotope composition. *Biological Reviews* **94**, 37–59 (2019).
- 732 77. Millard, S. P. *EnvStats: An R Package for Environmental Statistics.* (Springer, 2013).
- 733 78. Rosseel, Y. lavaan: An R Package for Structural Equation Modeling. *Journal of Statistical*  
734 *Software* **48**, 1–36 (2012).
- 735

## 736 Acknowledgements

737 The article is an outcome of the #GlobalCollembola community initiative that is voluntarily supported by  
738 researchers around the world. Data collection and analysis was supported by the Russian Science Foundation  
739 (19-74-00154 to A.P.) and by Deutsche Forschungsgemeinschaft (SFB990-EFForTS to S.S.). The following  
740 funding bodies provided support for individual contributors: ARC SRIEAS Grant SR200100005 Securing  
741 Antarctica’s Environmental Future to S.L.C., Slovak Scientific Grant Agency VEGA 1/0346/18 to Ľ.K., RFBR  
742 19-516-60002 to N.A.K., Carl Tryggers Stiftelse för Vetenskaplig Forskning and Qatar Petroleum to J.M.A.,  
743 BIO 27 (2013-2014)-MAGyP and PICTO 2084 (2012)-ANPCyT to V.B., DAAD-19-10 and MSM200962001 to  
744 T.C., grant TE, PN-III-P1-1.1-TE-2019-0358 to C.F., NWO grant 821.01.015 to O.F., National Natural  
745 Sciences Foundation of China No 41471037 and 41871042 to M.G., BIO 27 (2013-2014), MAGyP; PICT 2084  
746 (2012), FONCyT to D.F.G., NRF South African National Antarctic Programme grant 110734 to M.G., Natural  
747 Resources Canada (NRCan), EcoEnergy Innovation Initiative under the Office of Energy Research and  
748 Development, and the Natural Sciences and Engineering Research Council of Canada (NSERC) to I.T.H.,  
749 L.A.V. and L.R., Independent Research Fund Denmark grant no. DFF-4002-00384 to M.H., Estonian Science  
750 Foundation G9145 to M.I., SA-France bilateral grant to C.J., SA (NRF) / Russia (RFBR) Joint Science and  
751 Technology Research Collaboration project no. 19-516-60002 (FRBR) and no. 118904 (NRF) to M.P. and C.J.,  
752 European Research Council (ERC), European Union’s Horizon 2020 research and innovation programme (grant  
753 agreement no. 677232; to N.E.); iDiv, German Research Foundation (DFG–FZT 118, 202548816) to M.J. and  
754 N.E., French National Agency of Research (ANR) (JASSUR research project; ANR-12-VBDU-0011),  
755 «Ministère de l’Agriculture et de la Pêche» and «Ministère de l’Education Nationale de la Recherche et de la  
756 Technologie» (ACTA programme), «Ministère de l’Aménagement du Territoire et de l’Environnement» (Pnetox  
757 programme), EU-funded project, ECOGEN QLK5-CT-2002-01666 ([www.ecogen.dk](http://www.ecogen.dk)), “Agence de  
758 l’Environnement et de la Maîtrise de l’Énergie” (BIOINDICATEUR 2, BIOTECHNOSOL), ANDRA and GISFI  
759 ([www.gisfi.fr](http://www.gisfi.fr)) to S.J., GRR SER-BIODIV (Région Normandie, France) to MCha, ESF9258, B02 to A.K.,  
760 Fundamental Research Funds for the Central Universities (grant no. 2018CDXYCH0014) to D.L., DFG  
761 316045089 to J.L., Massey University Research Fund grant to M.A.M., DFG SCHE 376/38-2 to M.M.P., grant  
762 from the Austria Academy of Science: Heritage\_2020-043\_Modeling-Museum to P.Q., Slovak Scientific Grant  
763 Agency: VEGA Nos. 1/0441/03 and 1/3267/06 to N.R., Higher Education Commission of Pakistan to M.I.R.,  
764 RSF 21-74-00126 to R.A.S., Austrian Federal Government and European Union (Rural Development 2014-

765 2020) to J.S., AAAA-A17-117112850235-2 to A.A.T., Brazilian Council for Scientific and Technological  
766 Development - CNPq (grant no. 152717/2016-1) to B.R.W., 309030/2018-8 to D.Z. and 305426/2018-4 to  
767 B.C.B., National Natural Science Foundation of China (31970434, 31772491) to N.N.G., Research and  
768 Innovation Support Foundation of Santa Catarina (FAPESC) (6.309/2011-6/FAPESC) and the CNPq  
769 (563251/2010-7/CNPq) to L.C.I.O.F., O.K.-F., the Latvian Council of Science Grants no. 90.108, 93.140,  
770 96.0110, 01.0344 to E.J., CNPq for the Research Productivity Grant (305939/2018-1) to D.B., FPI-MICINN  
771 grant in the project INTERCAPA (CGL2014-56739-R) to P.H. Authors are grateful to Penelope Greenslade for  
772 providing the literature on Australian Collembola communities. Authors are grateful to Frans Janssens for  
773 providing the global checklist of Collembola.

## 774 Author contributions

775 A.M.P. designed the study, coordinated the collection, cleaning and standardization of data and wrote the first  
776 draft of the manuscript. C.G. and A.M.P. designed and performed the path analysis. J.v.d.H. designed and  
777 performed the geospatial modelling. A.B., B.C.B., L.D., E.K., N.A.K., J.F.P. and M.B.Pot. evaluated the data  
778 quality. M.P.B., S.L.C., J.F.P., D.J.R., T.C., N.E., S.S., M.Cha., J.F. and I.T.H. contributed to writing and  
779 conceptualisation of the manuscript. A.M.P., A.B., M.P.B., S.L.C., L.D., E.K., N.A.K., J.F.P., M.B.Pot., D.J.R.,  
780 J.M.A., J.I.A., I.B., V.B., S.B., T.B., G.C., M.Cha., T.Che., M.C., A.T.C., J.C., P.Č., A.M.d.l.P., A.D., S.D.F.,  
781 C.F., J.F., O.F., S.F., E.G., M.G., B.G., D.F.G., M.Gre., I.T.H., C.H., M.H., P.H., M.I., C.J., M.J., S.J., B.S.J.,  
782 E.J., L.C.I.O.F., O.K.-F., D.B., E.J.K., A.K., E.A.L., D.L., J.L., M.J.L., M.T.M., M.M.M., M.A.M., T.N., I.N.,  
783 R.O., J.G.P., M.M.P., P.Q., N.R., M.I.R., L.J.R., L.R., R.A.S., S.Sal., E.J.S., N.S., C.S., J.S., Y.B.S., S.K.S.,  
784 M.S., X.S., W.I.S., A.A.T., M.P.T., M.A.T., M.S.T., M.N.T., A.V.U., L.A.V., L.A.W., B.R.W., D.W., D.Wu.,  
785 Z.J.X., R.Y., D.Z., N.E. and S.S. contributed data. All authors contributed to editing of the paper.

786

787 **Competing interests.** Authors have no competing interests to declare.

788

789 Supplementary Information is available for this paper.

790

791 **Materials & Correspondence.** Correspondence and requests for materials should be  
792 addressed to A.M.P.

793 **Extended data**

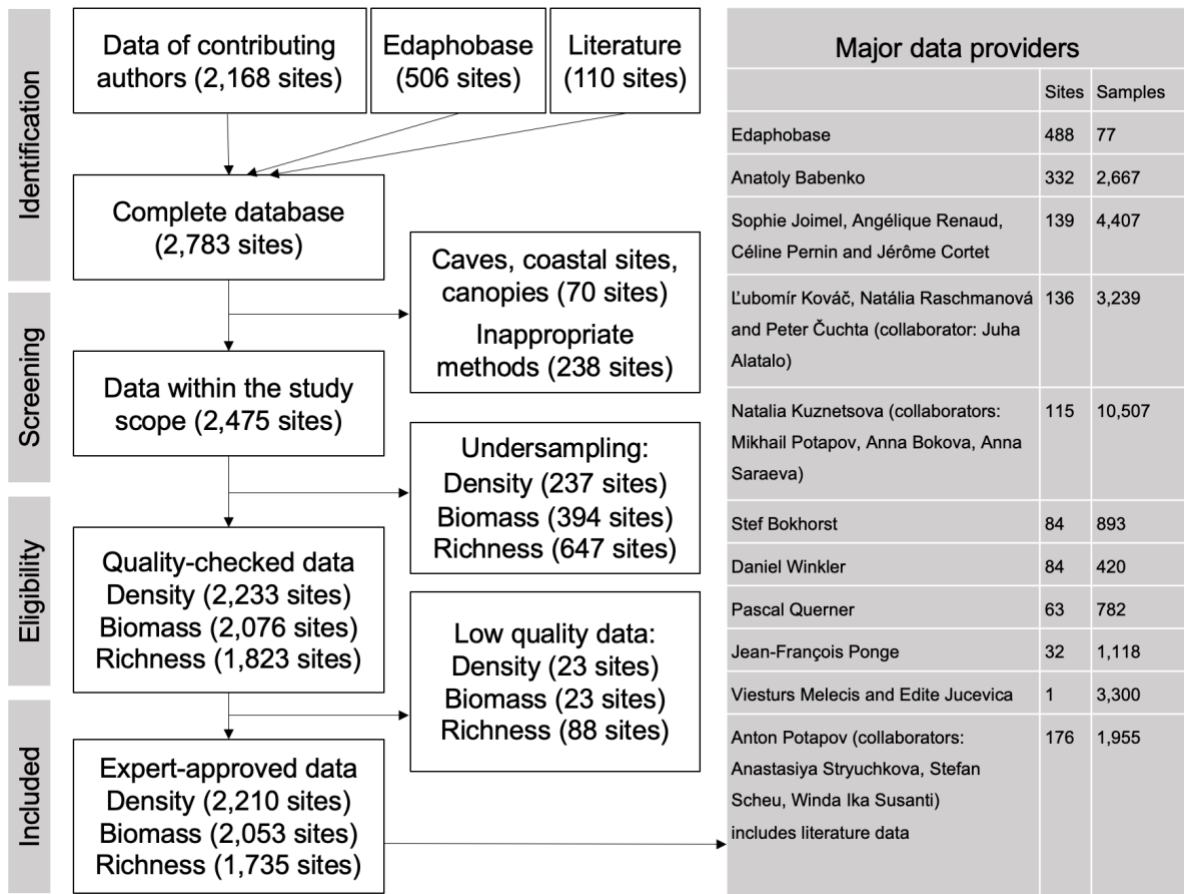

794

795 **Extended Data Fig. 1** | Flow diagram of data compilation and selection. Major data

796 providers of #GlobalCollembola whose data were used in the analysis are given in the shaded

797 table on the right side. Providers are ordered based on the number of sites, but exemplar

798 datasets with extensive sampling efforts (number of samples) are given to illustrate the

799 available data.

800

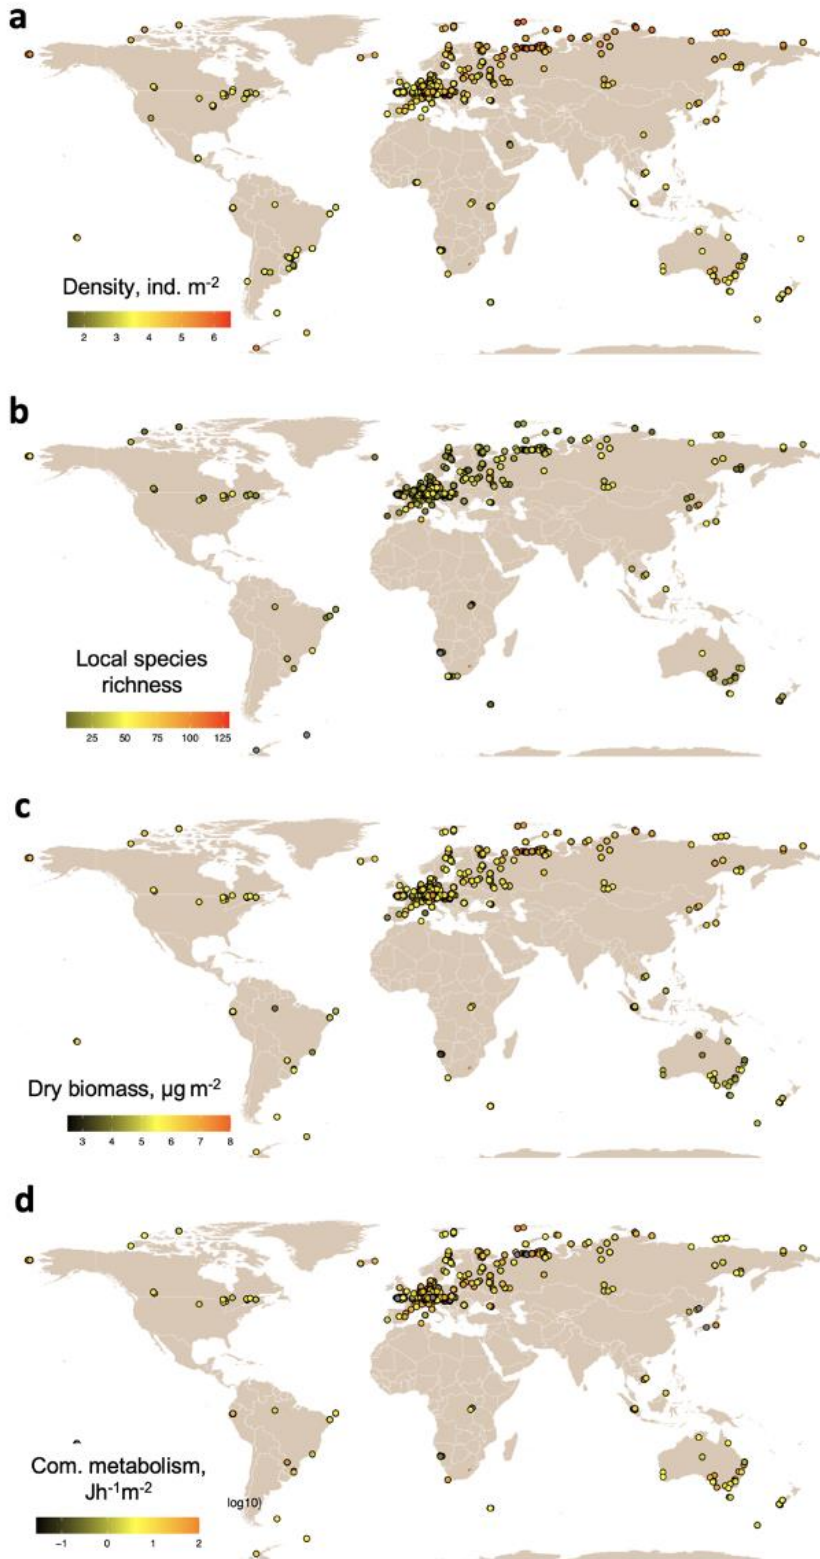

801

802 **Extended Data Fig. 2 | Selected sampling sites that were used in the analysis. a, Density**

803 (n = 2210), **b, Local species richness** (n = 1735); **c, Dry biomass** (n = 2053); **d, Community**

804 **metabolism** (n = 2053). Data scales are logarithmic except for local species richness.

805 **Extended Data Table 1** | Regression coefficients used to estimate the dry and fresh body  
 806 masses of springtail genera based on body lengths. For each genus, the average body mass  
 807 ( $M$ ) [ $\mu\text{g}$  dry weight] was calculated from the average body length ( $L$ ) [mm] using the power  
 808 equation:  $M = a * L^b$ , where  $a$  is the normalisation coefficient and  $b$  is the exponent.  
 809 Abdomen length of Symphypleona was used in the original equations and was assumed to be  
 810 0.83 of the total body length. Two sets of coefficients coming from two independent  
 811 studies<sup>56,57</sup> were used for each morphogroup ( $a_1, b_1$  and  $a_2, b_2$ ) and the two estimates of dry  
 812 body mass were averaged. Fresh body mass was calculated from the resulting average by  
 813 dividing it by the proportion of the dry weight.

| Morphogroup                             | Normalisation<br>( $a_1$ ) | Exponent<br>( $b_1$ ) | Normalisation<br>( $a_2$ ) | Exponent<br>( $b_2$ ) | Dry weight<br>proportion |
|-----------------------------------------|----------------------------|-----------------------|----------------------------|-----------------------|--------------------------|
| Entomobryidae                           | 11.749                     | 2.52                  | 14.256                     | 2.708                 | 0.30                     |
| Isotomidae<br>(small)                   | 6.457                      | 2.99                  | 5.623                      | 2.799                 | 0.36                     |
| Isotomidae<br>(large)                   | 5.623                      | 3.28                  | 8.427                      | 3.223                 | 0.36                     |
| Onychiuridae                            | 4.266                      | 2.75                  | 5.598                      | 2.769                 | 0.30                     |
| Poduromorpha<br>(excl.<br>Onychiuridae) | 9.772                      | 2.55                  | 5.598                      | 2.769                 | 0.30                     |
| Symphypleona                            | 190.546                    | 3.627                 | 39.628                     | 3.796                 | 0.21                     |
| Tomoceridae                             | 9.204                      | 2.744                 | 14.256                     | 2.708                 | 0.25                     |

814



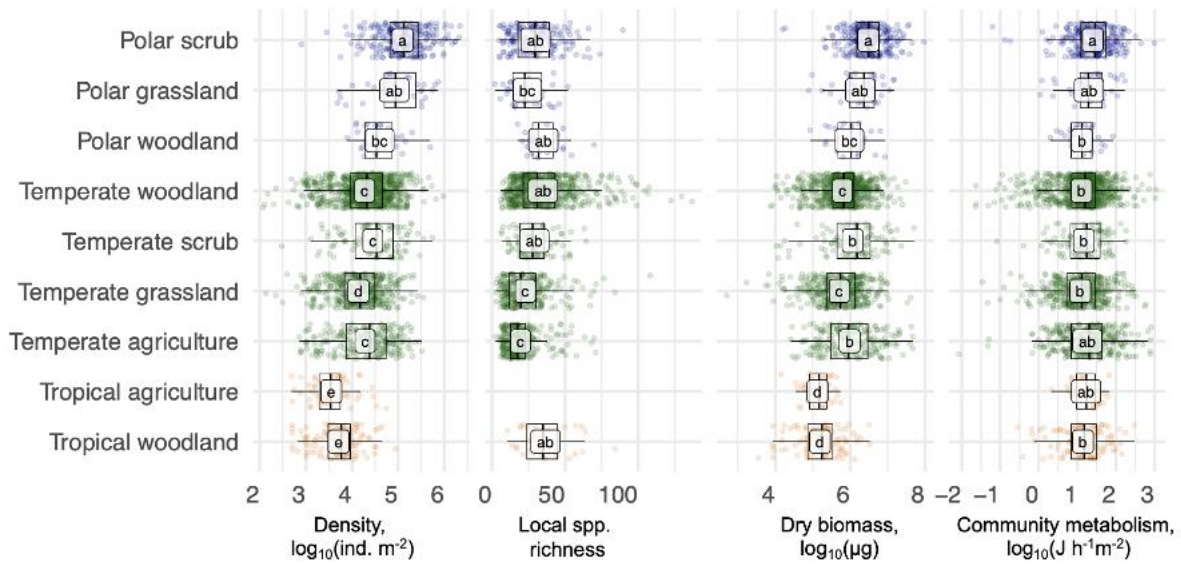

815

816 **Extended Data Fig. 3 | Mean estimates for community parameters in different**

817 **ecosystem types.** Points represent sites, labels represent mean values, means sharing the

818 same letter are not significantly different (Tukey's HSD test for multiple comparisons<sup>64</sup>). For

819 ecosystem classification see Methods.

820

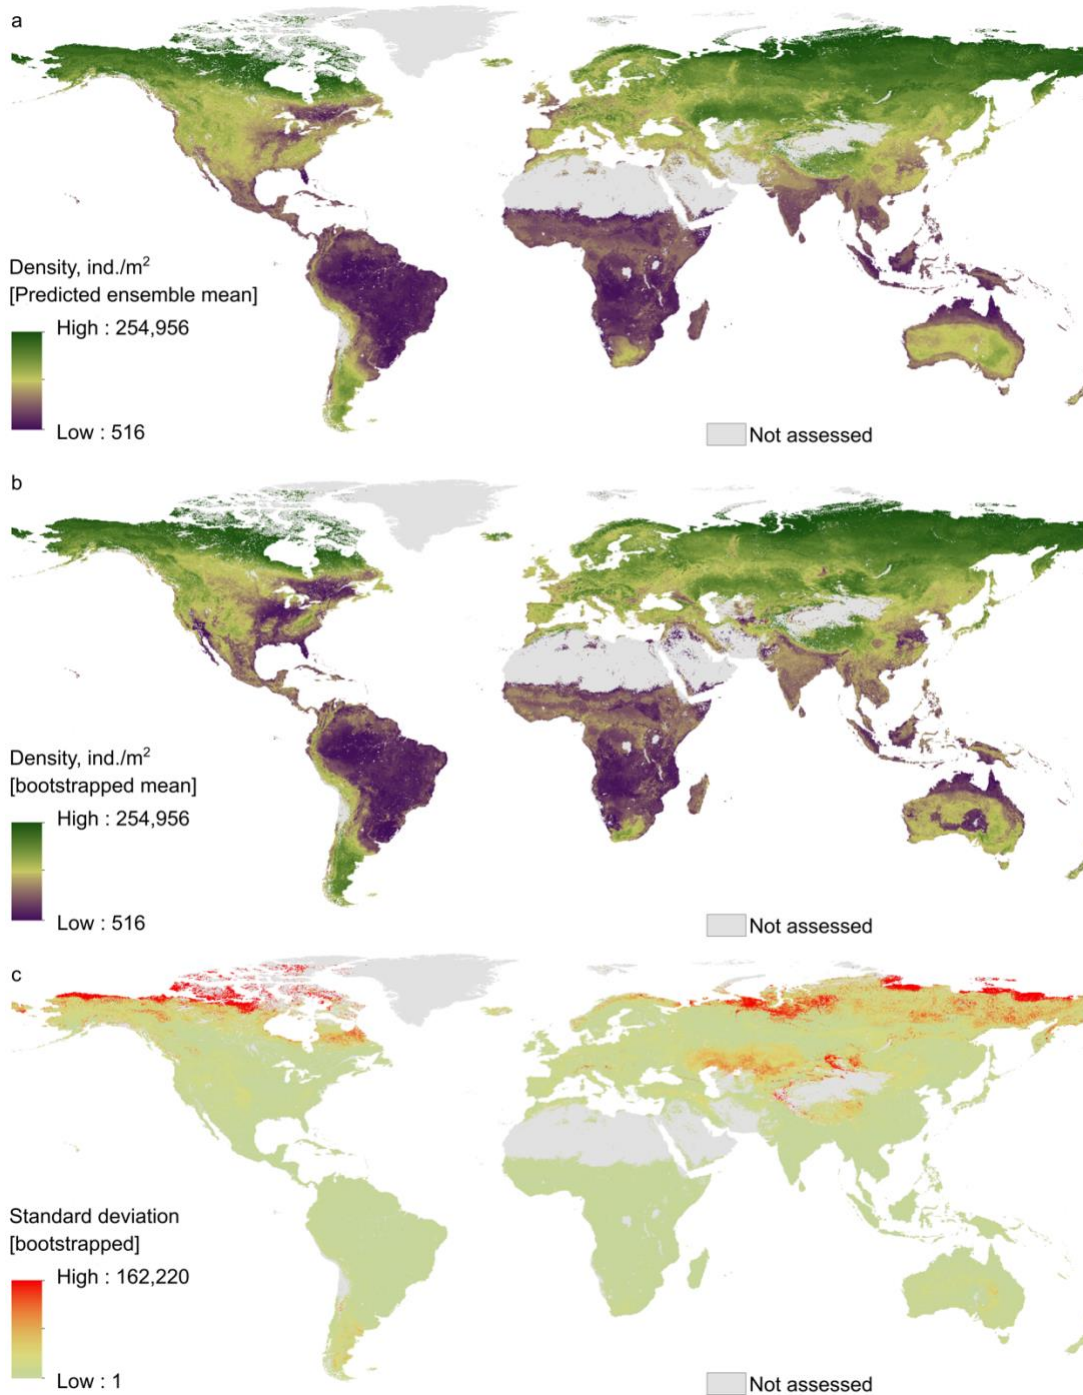

821

822

**Extended Data Fig. 4 | Global projection of springtail density.** Distribution was predicted

823

with the random forest algorithm (a) based on the entire dataset and (b) using mean

824

prediction after bootstrapping data by continents ( $R^2 = 0.57 \pm 0.04$ ). Green colour identifies

825

hot spots, violet colour cold spots. The bottom map (c) shows the standard deviation across

826

the bootstrapped predictions (red – high, yellow – low). All data were projected at the 30

827

arcsec (approximately 1 km<sup>2</sup>) pixel scale.

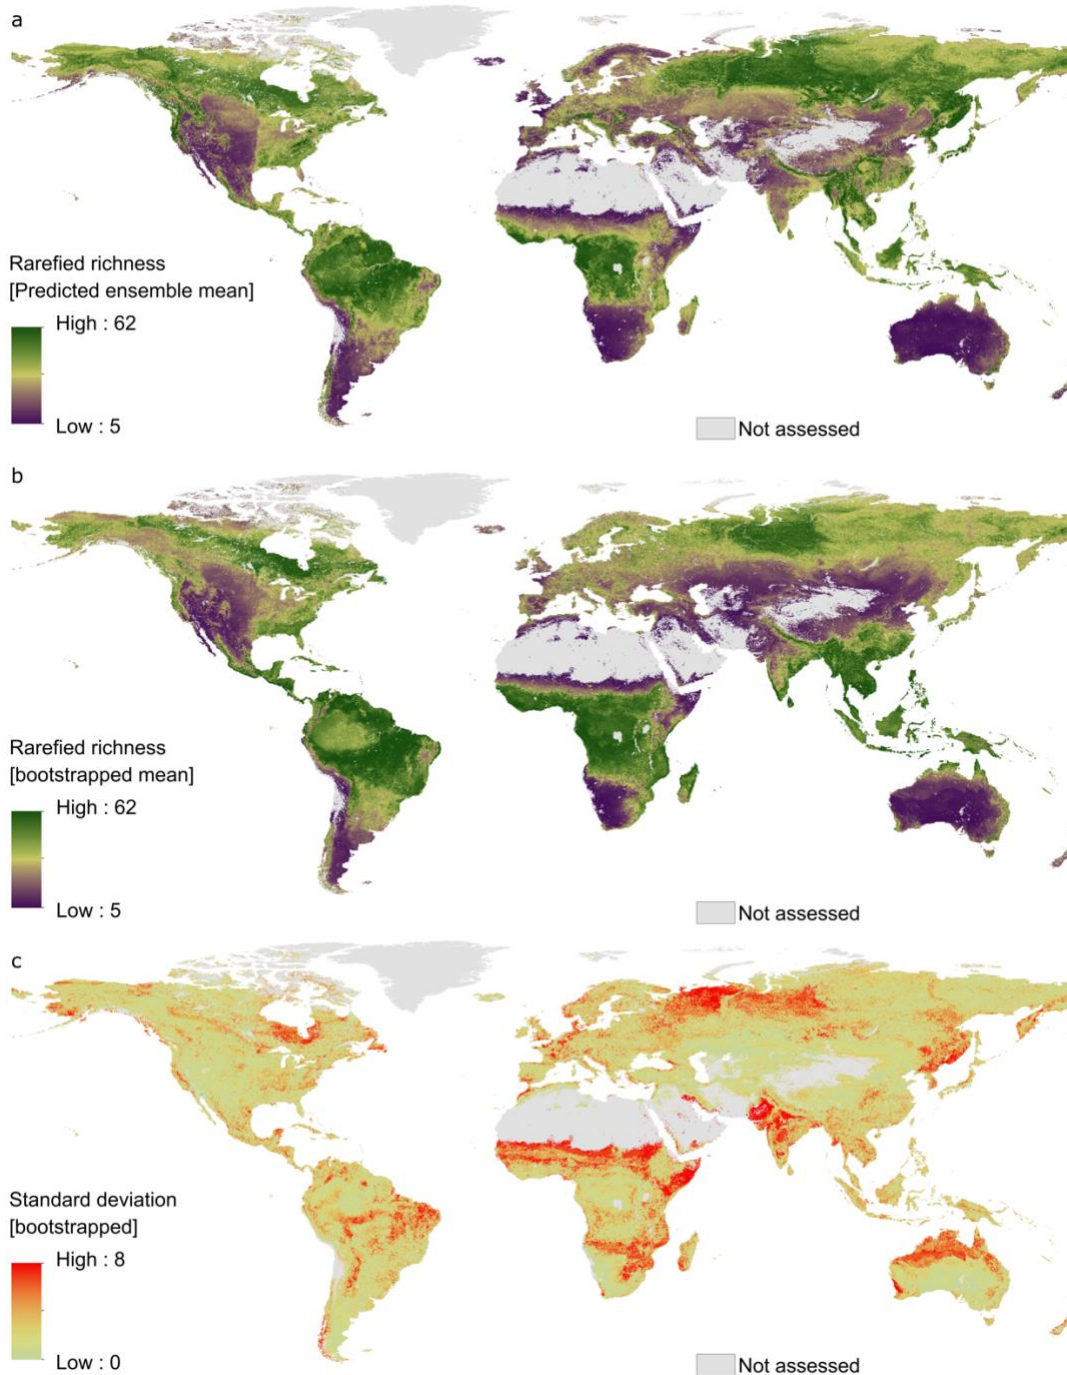

828

829 **Extended Data Fig. 5 | Global projection of springtail local species richness.** Distribution

830 was predicted with the random forest algorithm (a) based on the entire dataset and (b) using

831 mean prediction after bootstrapping data by continents ( $R^2 = 0.31 \pm 0.06$ ). Green colour

832 identifies hot spots, violet colour cold spots. The bottom map (c) shows the standard

833 deviation across the bootstrapped predictions (red – high, yellow – low). All data were

834 projected at the 30 arcsec (approximately 1 km<sup>2</sup>) pixel scale.



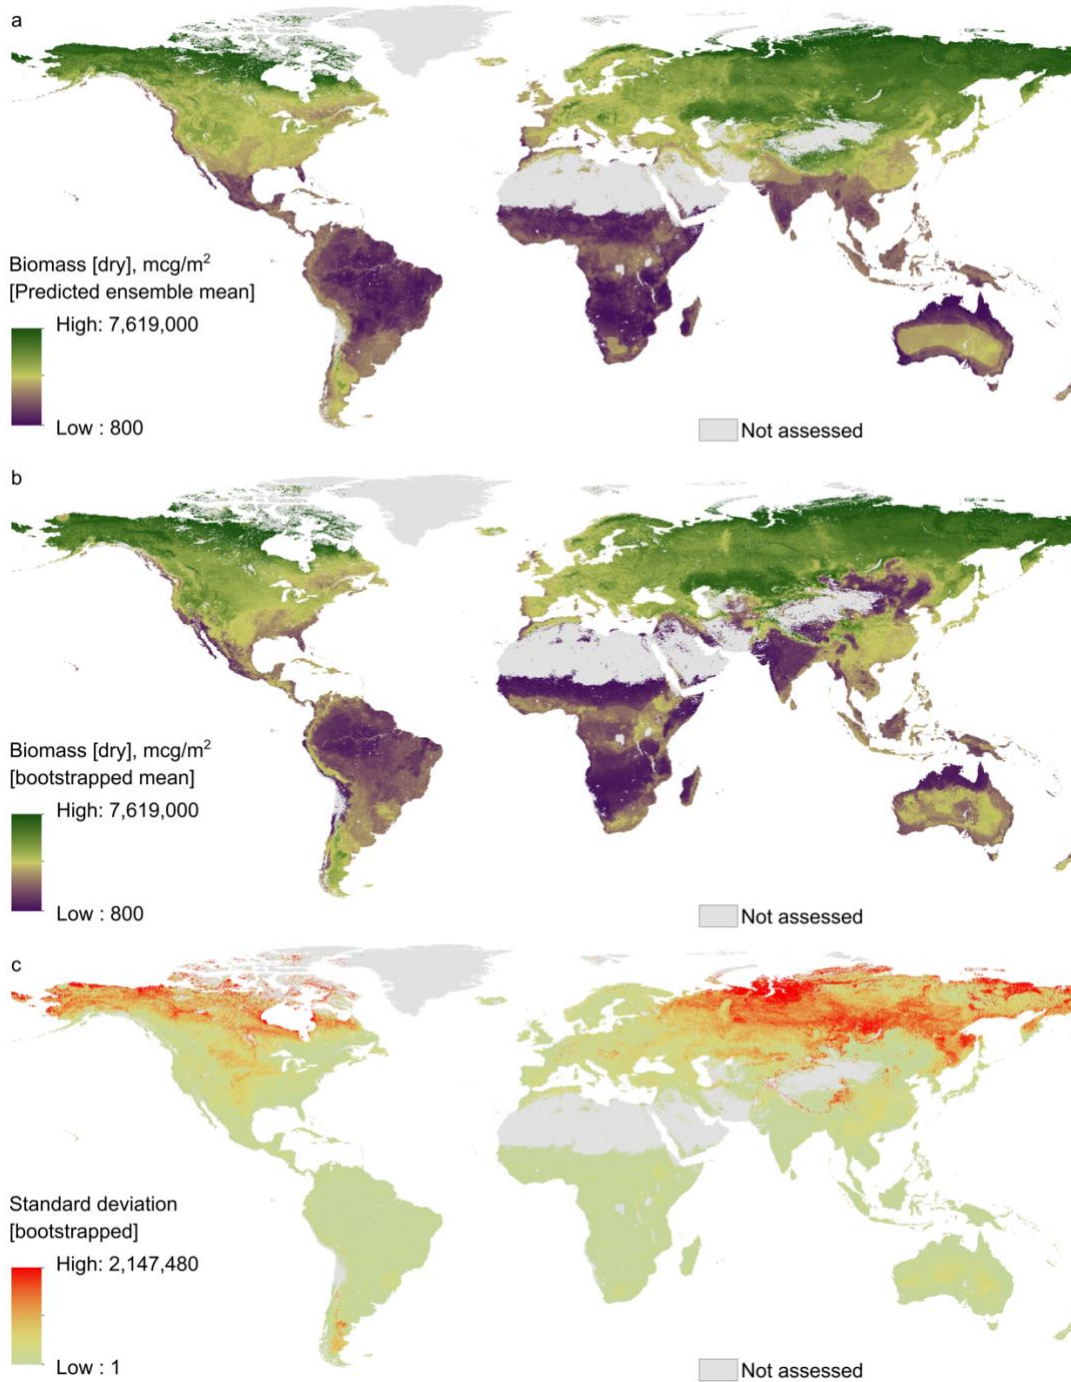

835

836 **Extended Data Fig. 6 | Global projection of springtail biomass.** Distribution was predicted

837 with the random forest algorithm (a) based on the entire dataset and (b) using mean

838 prediction after bootstrapping data by continents ( $R^2 = 0.47 \pm 0.05$ ). Green colour identifies

839 hot spots, violet colour cold spots. The bottom map (c) shows the standard deviation across

840 the bootstrapped predictions (red – high, yellow – low). All data were projected at the 30

841 arcsec (approximately 1 km<sup>2</sup>) pixel scale.

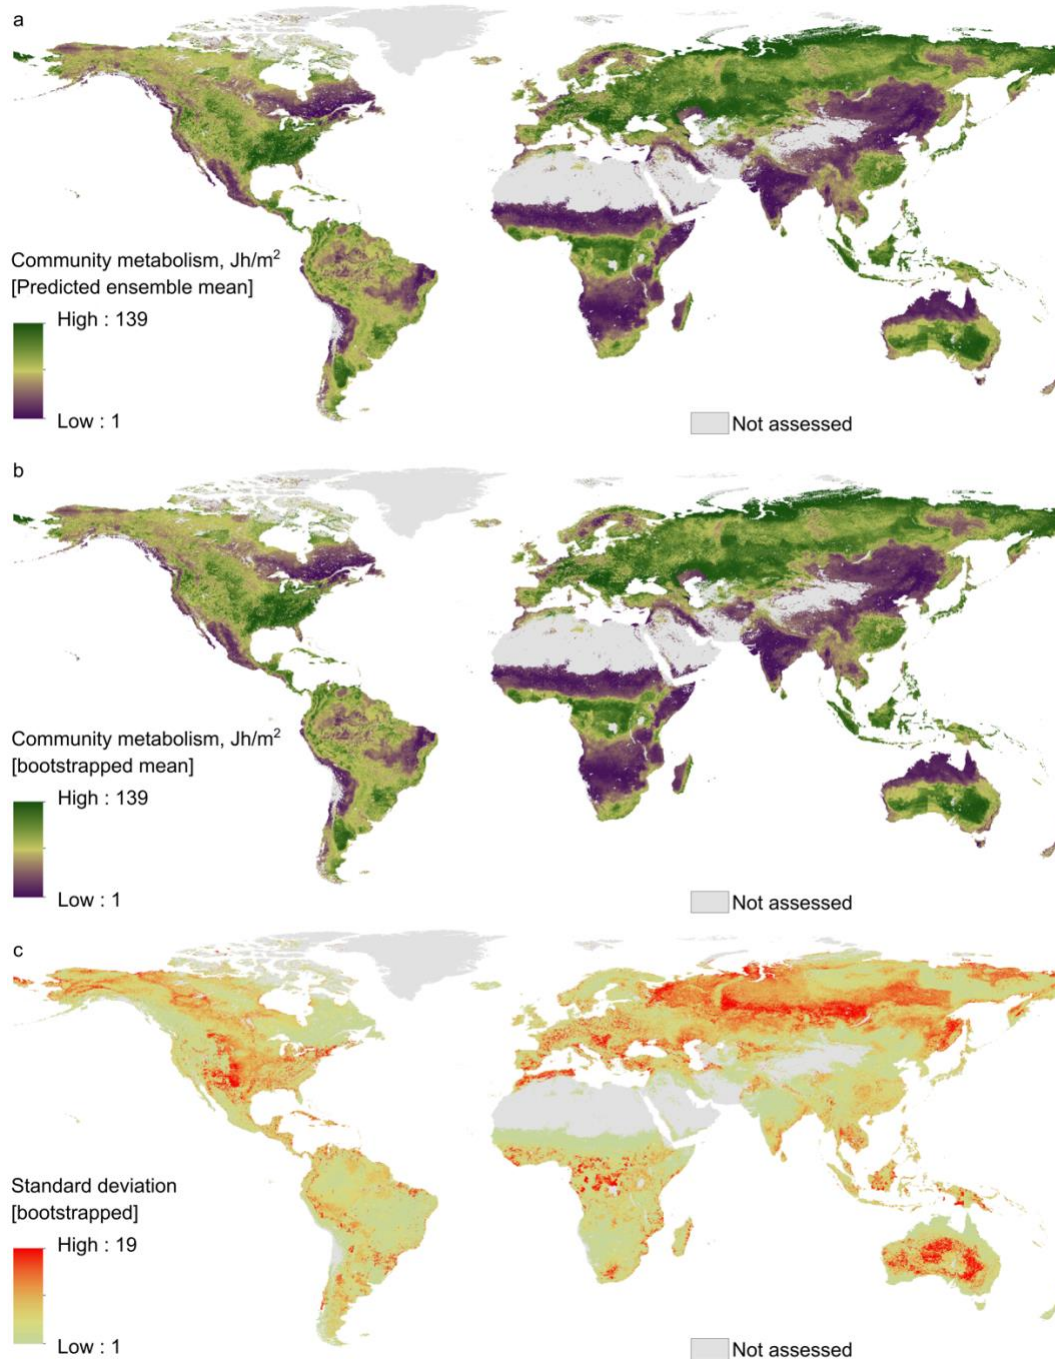

842

843 **Extended Data Fig. 7 | Global projection of springtail community metabolism.**

844 Distribution was predicted with the random forest algorithm (a) based on the entire dataset

845 and (b) using mean prediction after bootstrapping data by continents ( $R^2 = 0.33 \pm 0.09$ ).

846 Green colour identifies hot spots, violet colour cold spots. The bottom map (c) shows the

847 standard deviation across the bootstrapped predictions (red – high, yellow – low). All data

848 were projected at the 30 arcsec (approximately 1 km<sup>2</sup>) pixel scale.

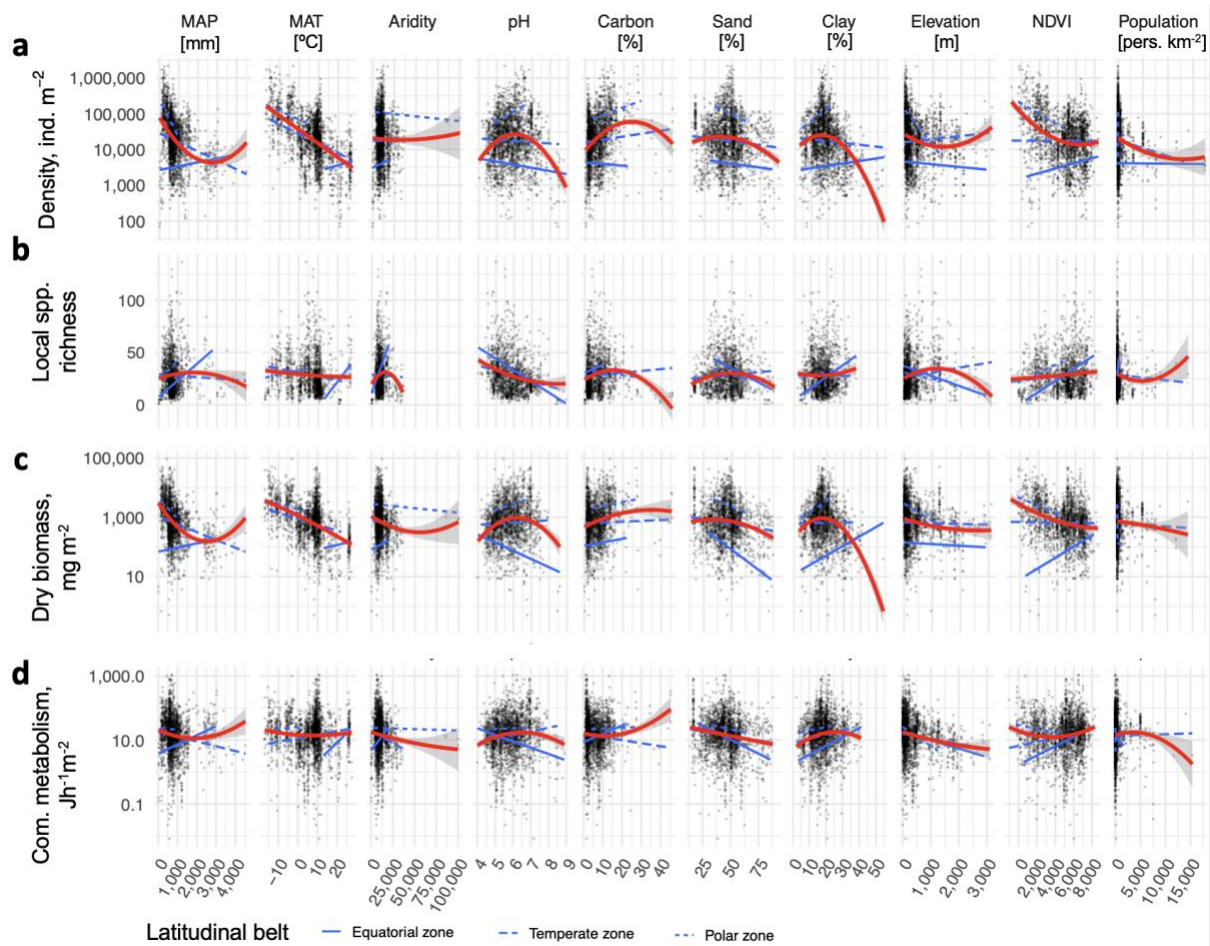

850 **Extended Data Fig. 8 | Associations of selected environmental variables with springtail**

851 **density, local species richness, dry biomass and community metabolism. Quadratic**

852 function was used for approximation to illustrate global trends (red line). Blue lines show

853 linear trends in equatorial (solid), temperate (long dash) and polar zones (short dash).

854



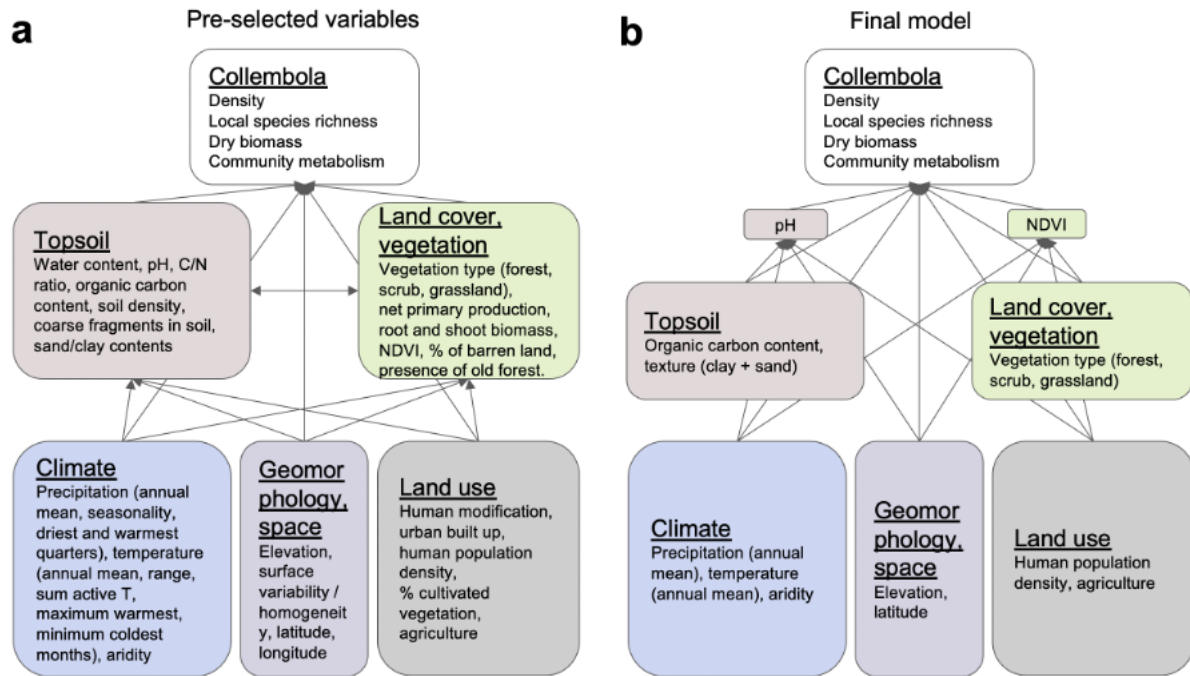

855

856 **Extended Data Fig. 9 | Initial and final relationship diagram in the path analysis.** Factors

857 directly and indirectly affecting community parameters of springtails at the global scale were

858 pre-selected based on expert opinion (a). Factors in the final model (b) were further selected

859 according to their global availability and collinear factors were removed. The global

860 distributions of pH and NDVI (Normalized Difference Vegetation Index) are initially

861 modelled based on other factors, which was accounted for in the final model.
